# Supplementary material for: Synthesis of a sucrose dimer with enone tether; a study on its functionalization
Source: publisher site journal article supplement (doi:10.3762/bjoc.10.124), 2014-05-28

## Supporting Information

for

# Synthesis of a sucrose dimer with enone tether; a study on its functionalization

Zbigniew Pakulski, Norbert Gajda, Magdalena Jawiczuk, Jadwiga Frelek, Piotr Cmoch and Sławomir Jarosz\*

Address: Institute of Organic Chemistry, Polish Academy of Sciences, ul. Kasprzaka 44/52, 01-224 Warsaw, Poland

Email: Sławomir Jarosz - slawomir.Jarosz@icho.edu.pl

\* Corresponding author

### The $^1\text{H}$ and $^{13}\text{C}$ NMR spectra of all new compounds (9–16Ac).

Table of contents:

|                                                    | page |
|----------------------------------------------------|------|
| $^1\text{H}$ NMR spectrum of <b>9</b> .....        | S2   |
| $^{13}\text{C}$ NMR spectrum of <b>9</b> .....     | S3   |
| $^1\text{H}$ NMR spectrum of <b>10</b> .....       | S4   |
| $^{13}\text{C}$ NMR spectrum of <b>10</b> .....    | S5   |
| $^1\text{H}$ NMR spectrum of <b>11</b> .....       | S6   |
| $^{13}\text{C}$ NMR spectrum of <b>11</b> .....    | S7   |
| $^1\text{H}$ NMR spectrum of <b>12</b> .....       | S8   |
| $^{13}\text{C}$ NMR spectrum of <b>12</b> .....    | S9   |
| $^1\text{H}$ NMR spectrum of <b>13</b> .....       | S10  |
| $^{13}\text{C}$ NMR spectrum of <b>13</b> .....    | S11  |
| $^1\text{H}$ NMR spectrum of <b>14</b> .....       | S12  |
| $^{13}\text{C}$ NMR spectrum of <b>14</b> .....    | S13  |
| $^1\text{H}$ NMR spectrum of <b>14-Ac</b> .....    | S14  |
| $^{13}\text{C}$ NMR spectrum of <b>14-Ac</b> ..... | S15  |
| $^1\text{H}$ NMR spectrum of <b>15</b> .....       | S16  |
| $^{13}\text{C}$ NMR spectrum of <b>15</b> .....    | S17  |
| $^1\text{H}$ NMR spectrum of <b>16</b> .....       | S18  |
| $^{13}\text{C}$ NMR spectrum of <b>16</b> .....    | S19  |
| $^1\text{H}$ NMR spectrum of <b>16-Ac</b> .....    | S20  |
| $^{13}\text{C}$ NMR spectrum of <b>16-Ac</b> ..... | S21  |

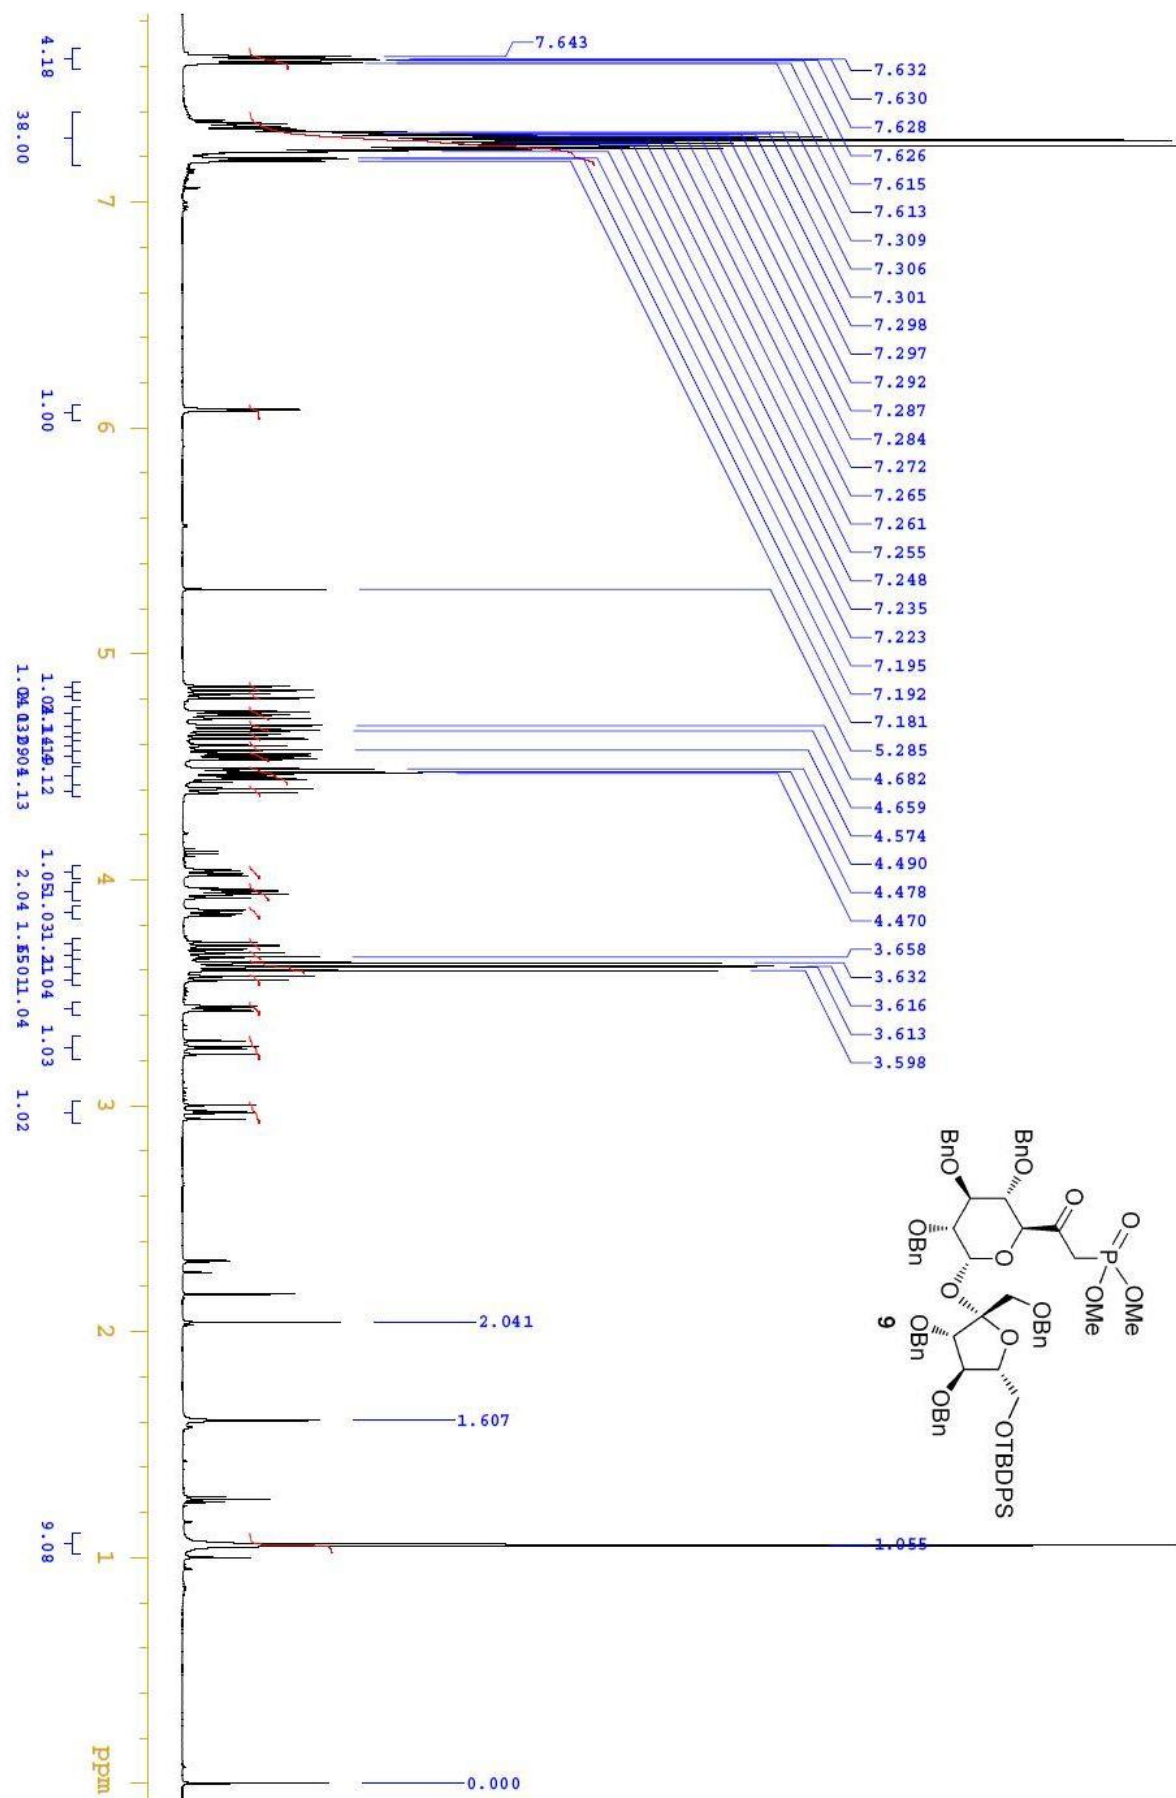

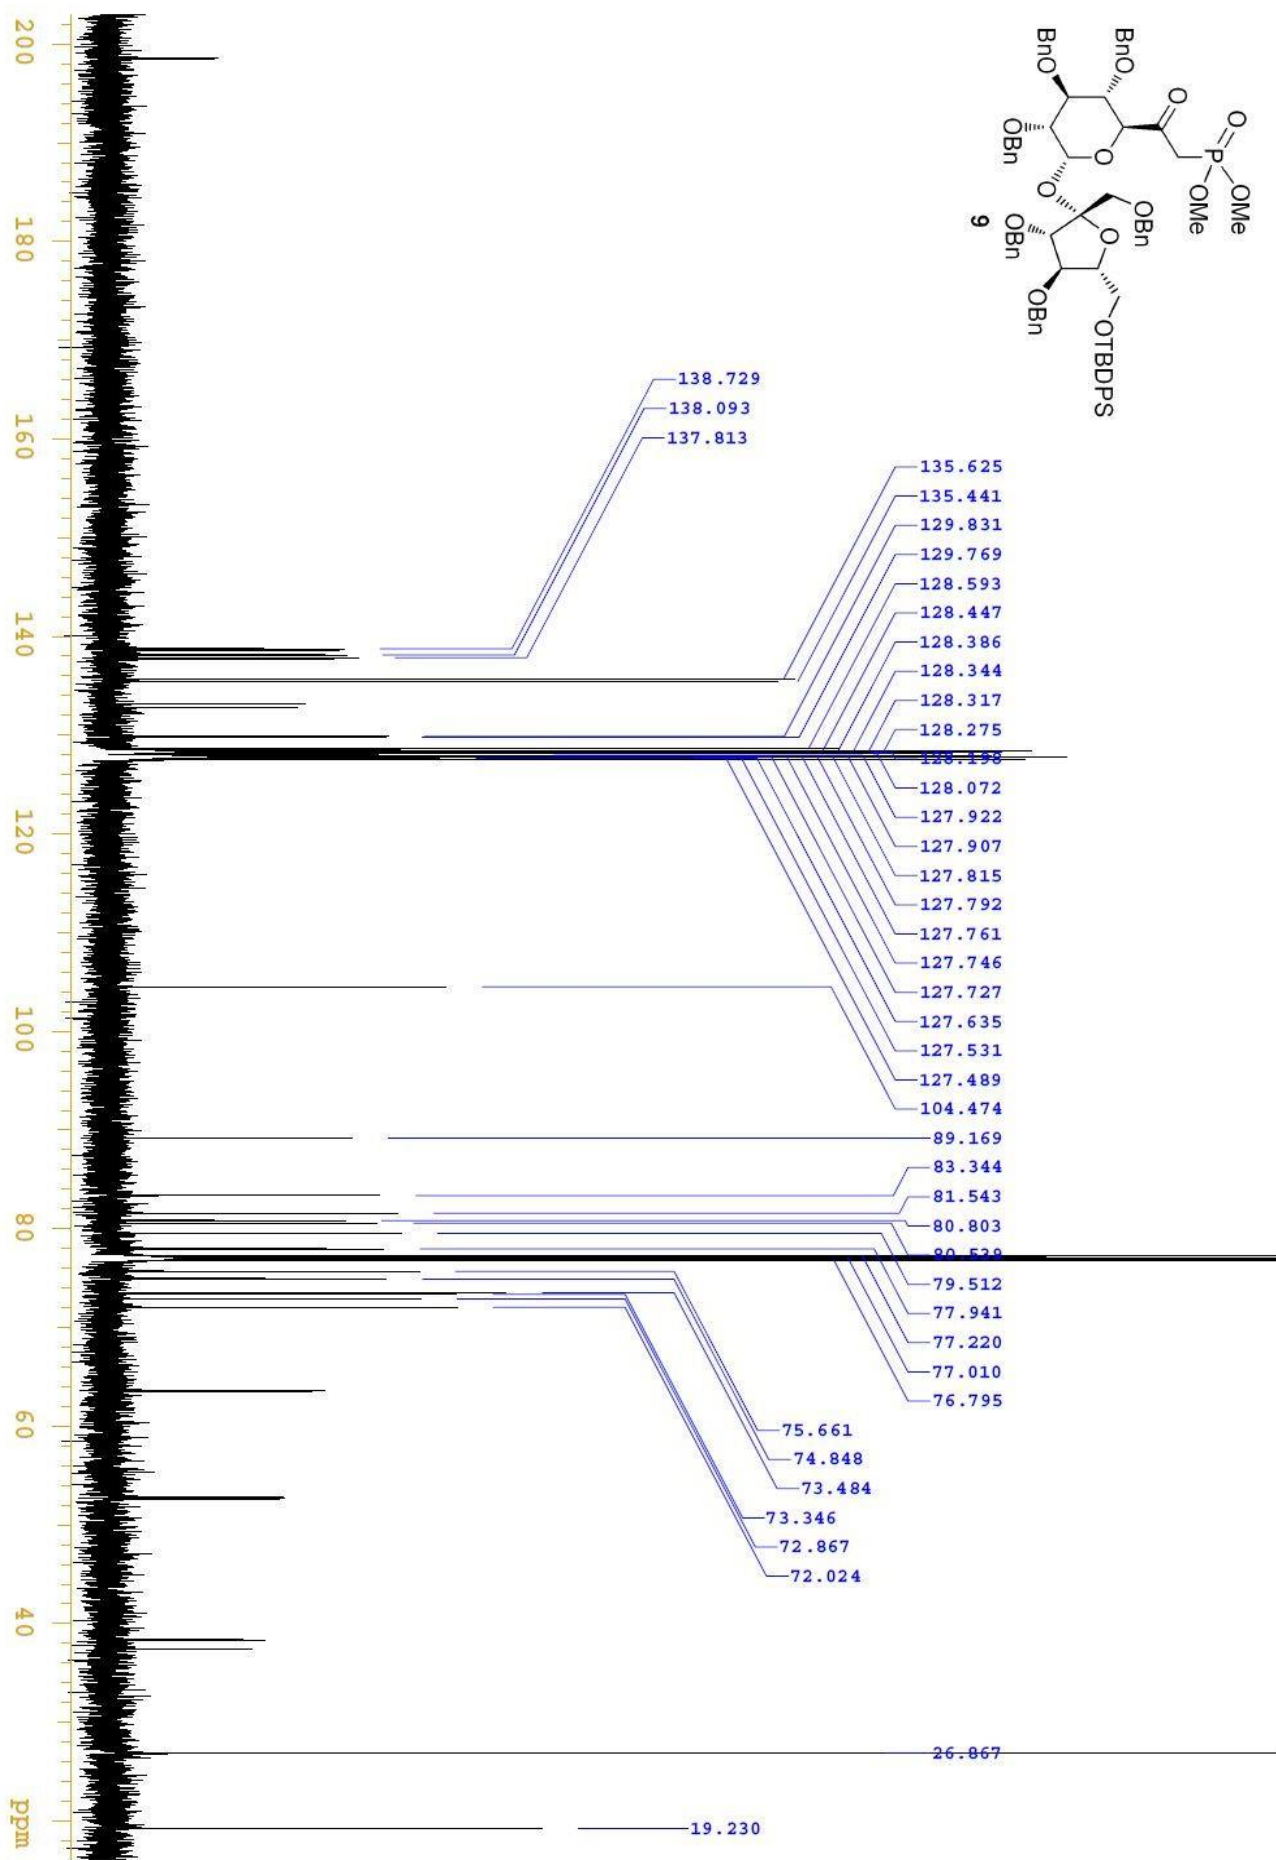

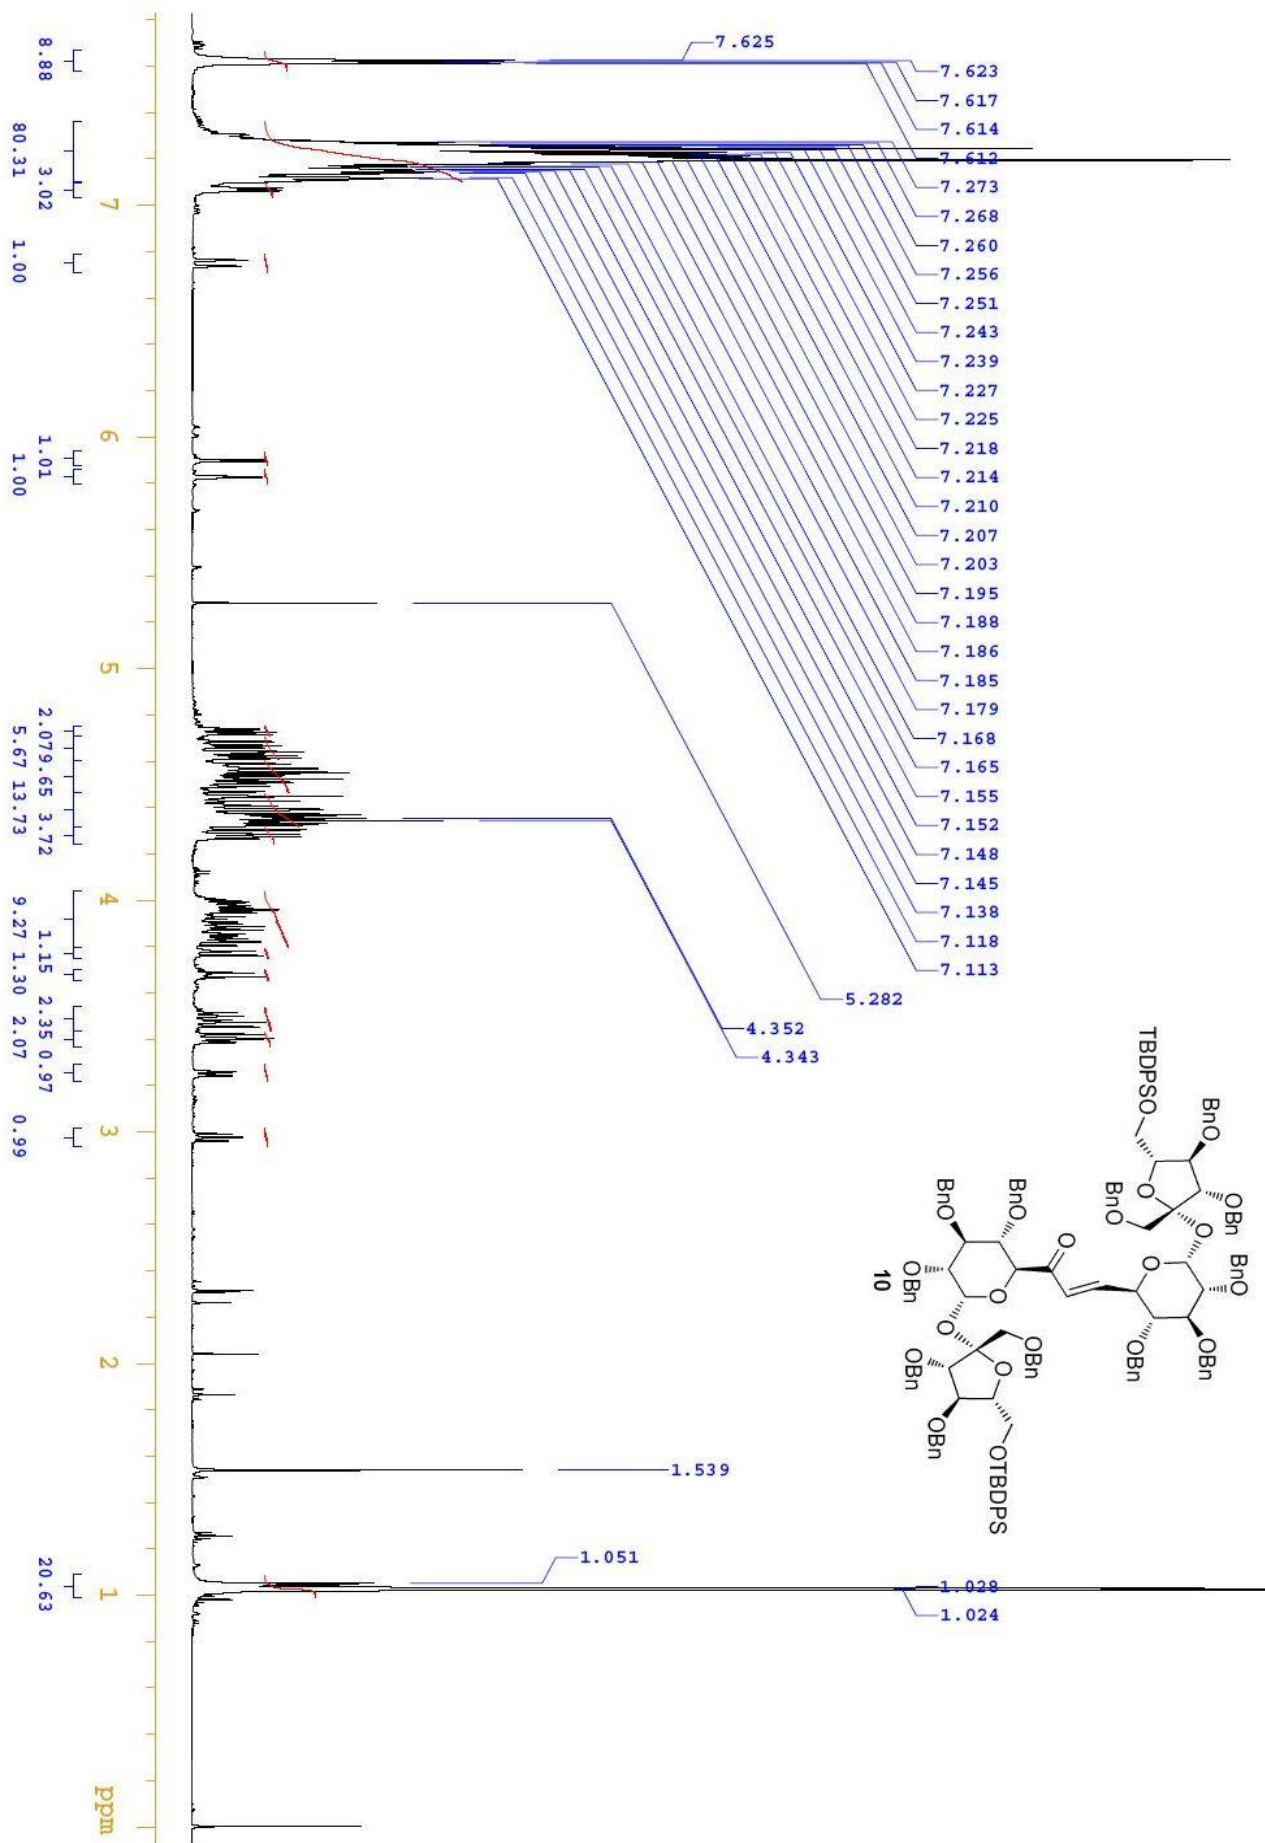

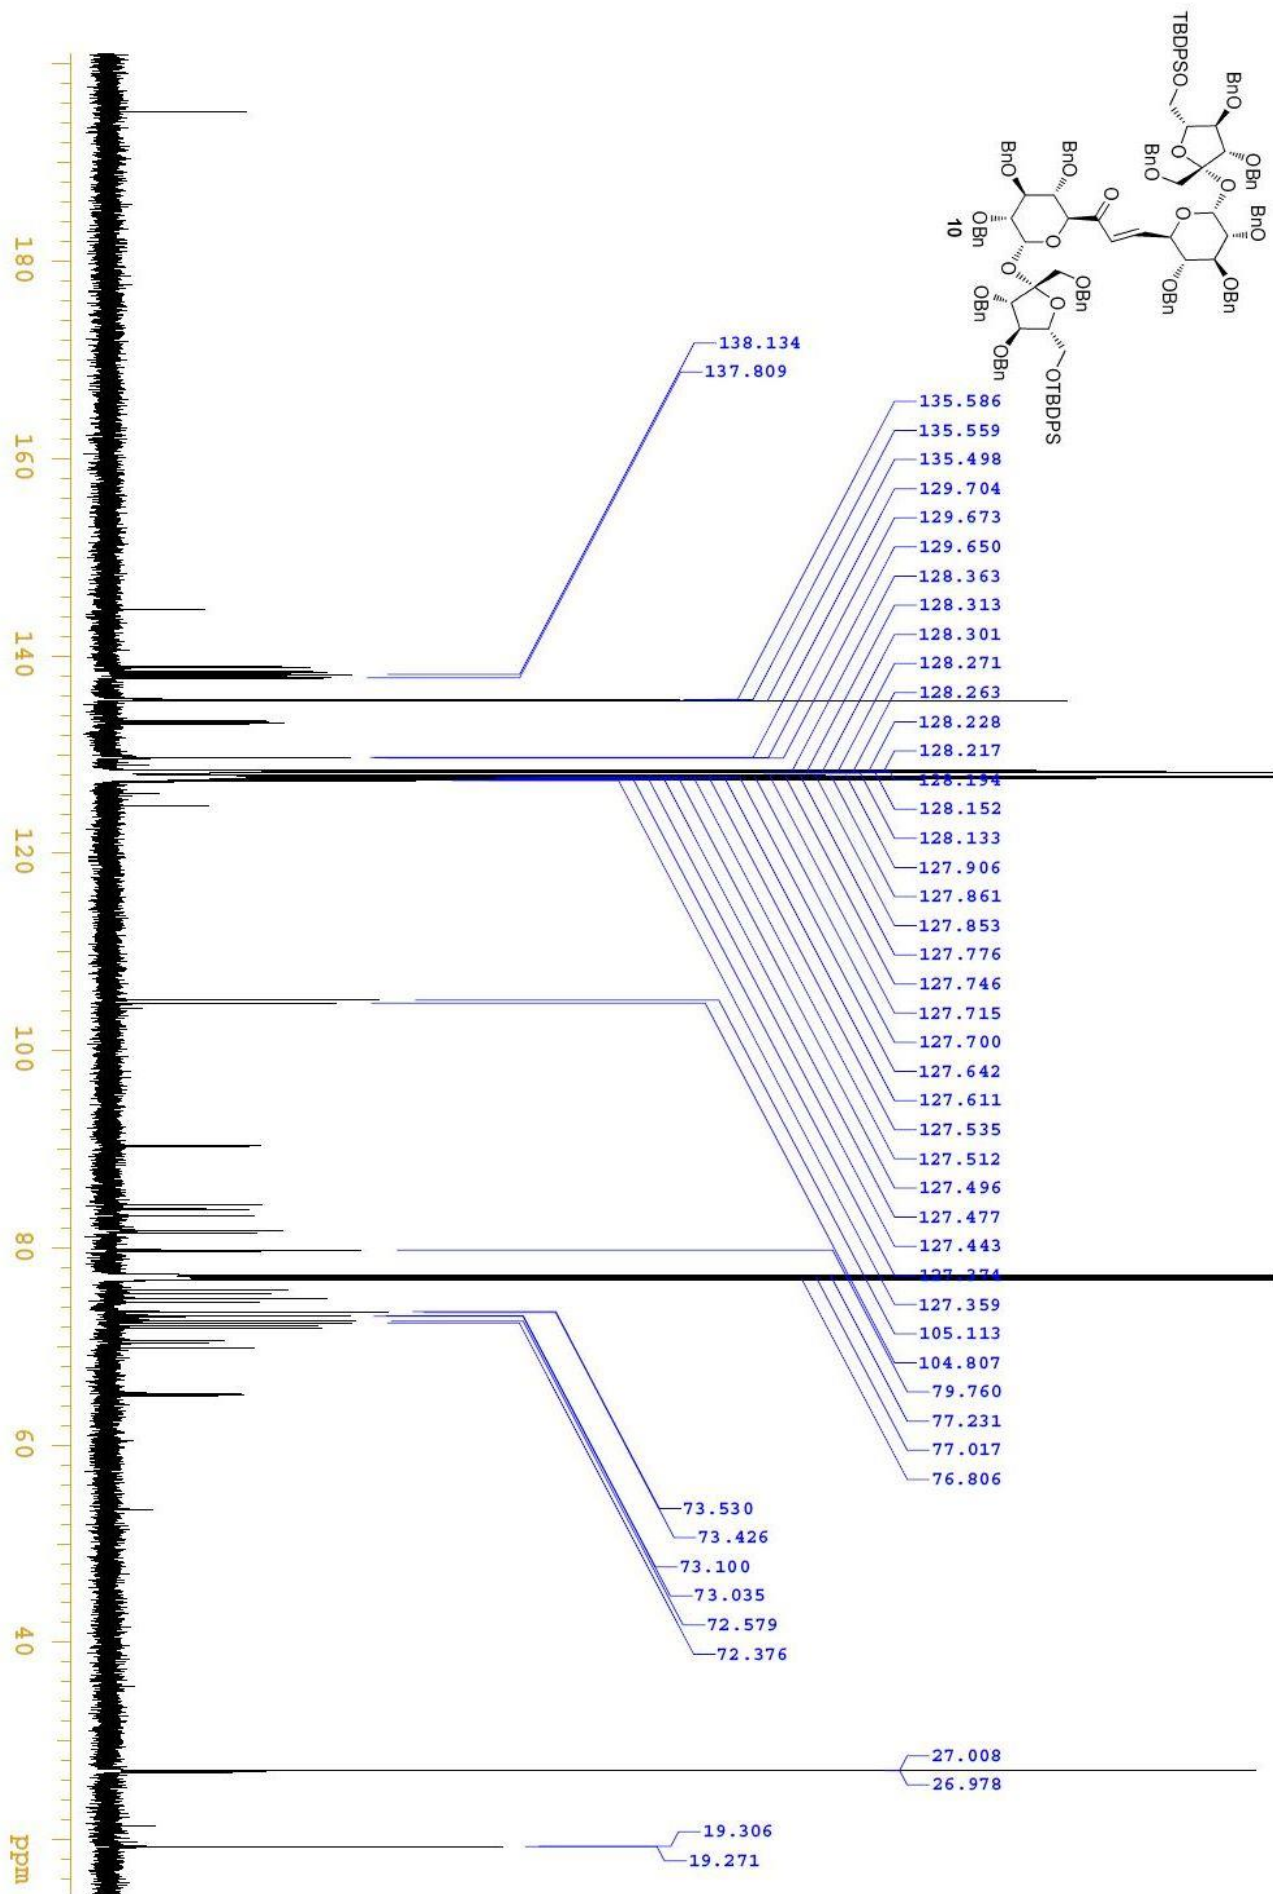



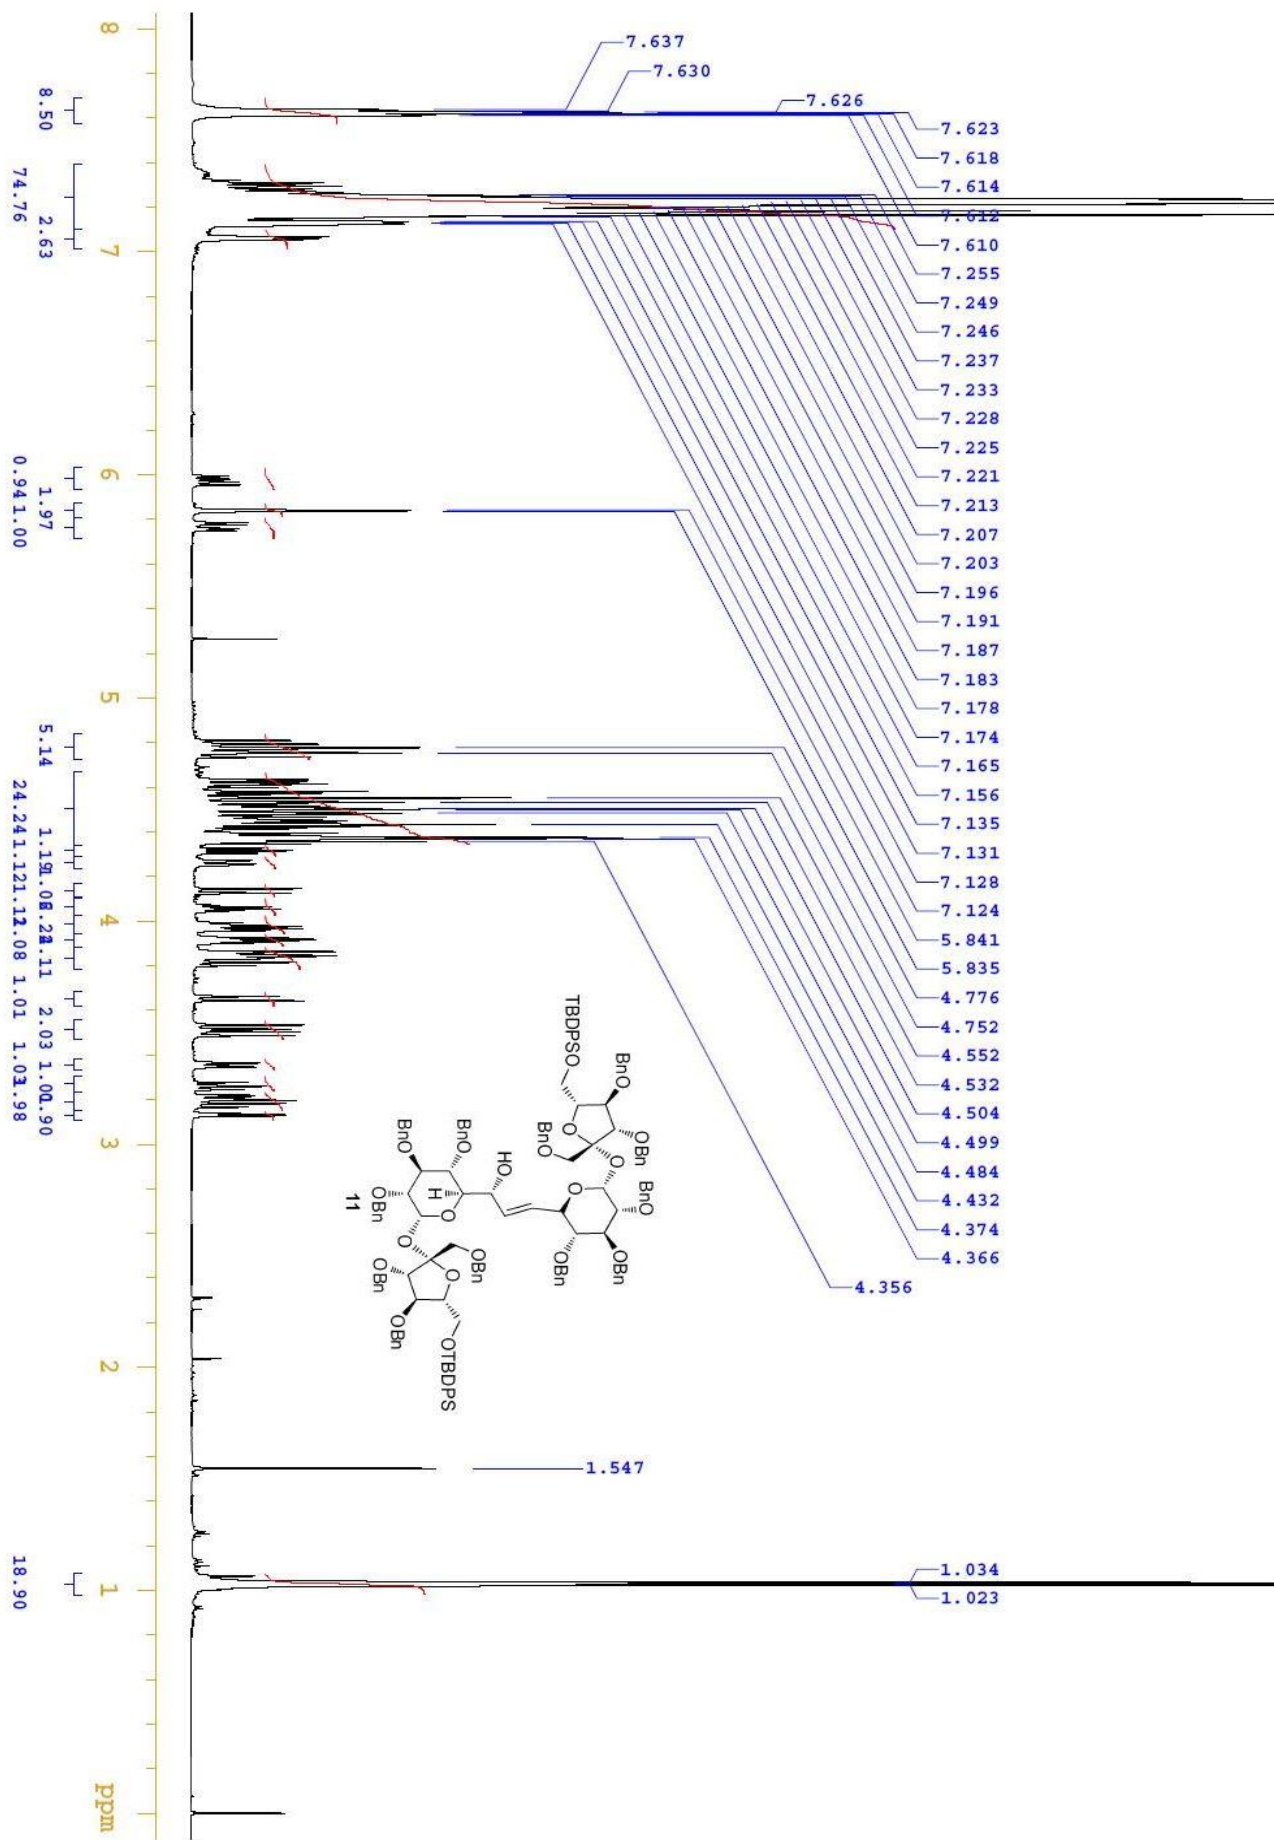

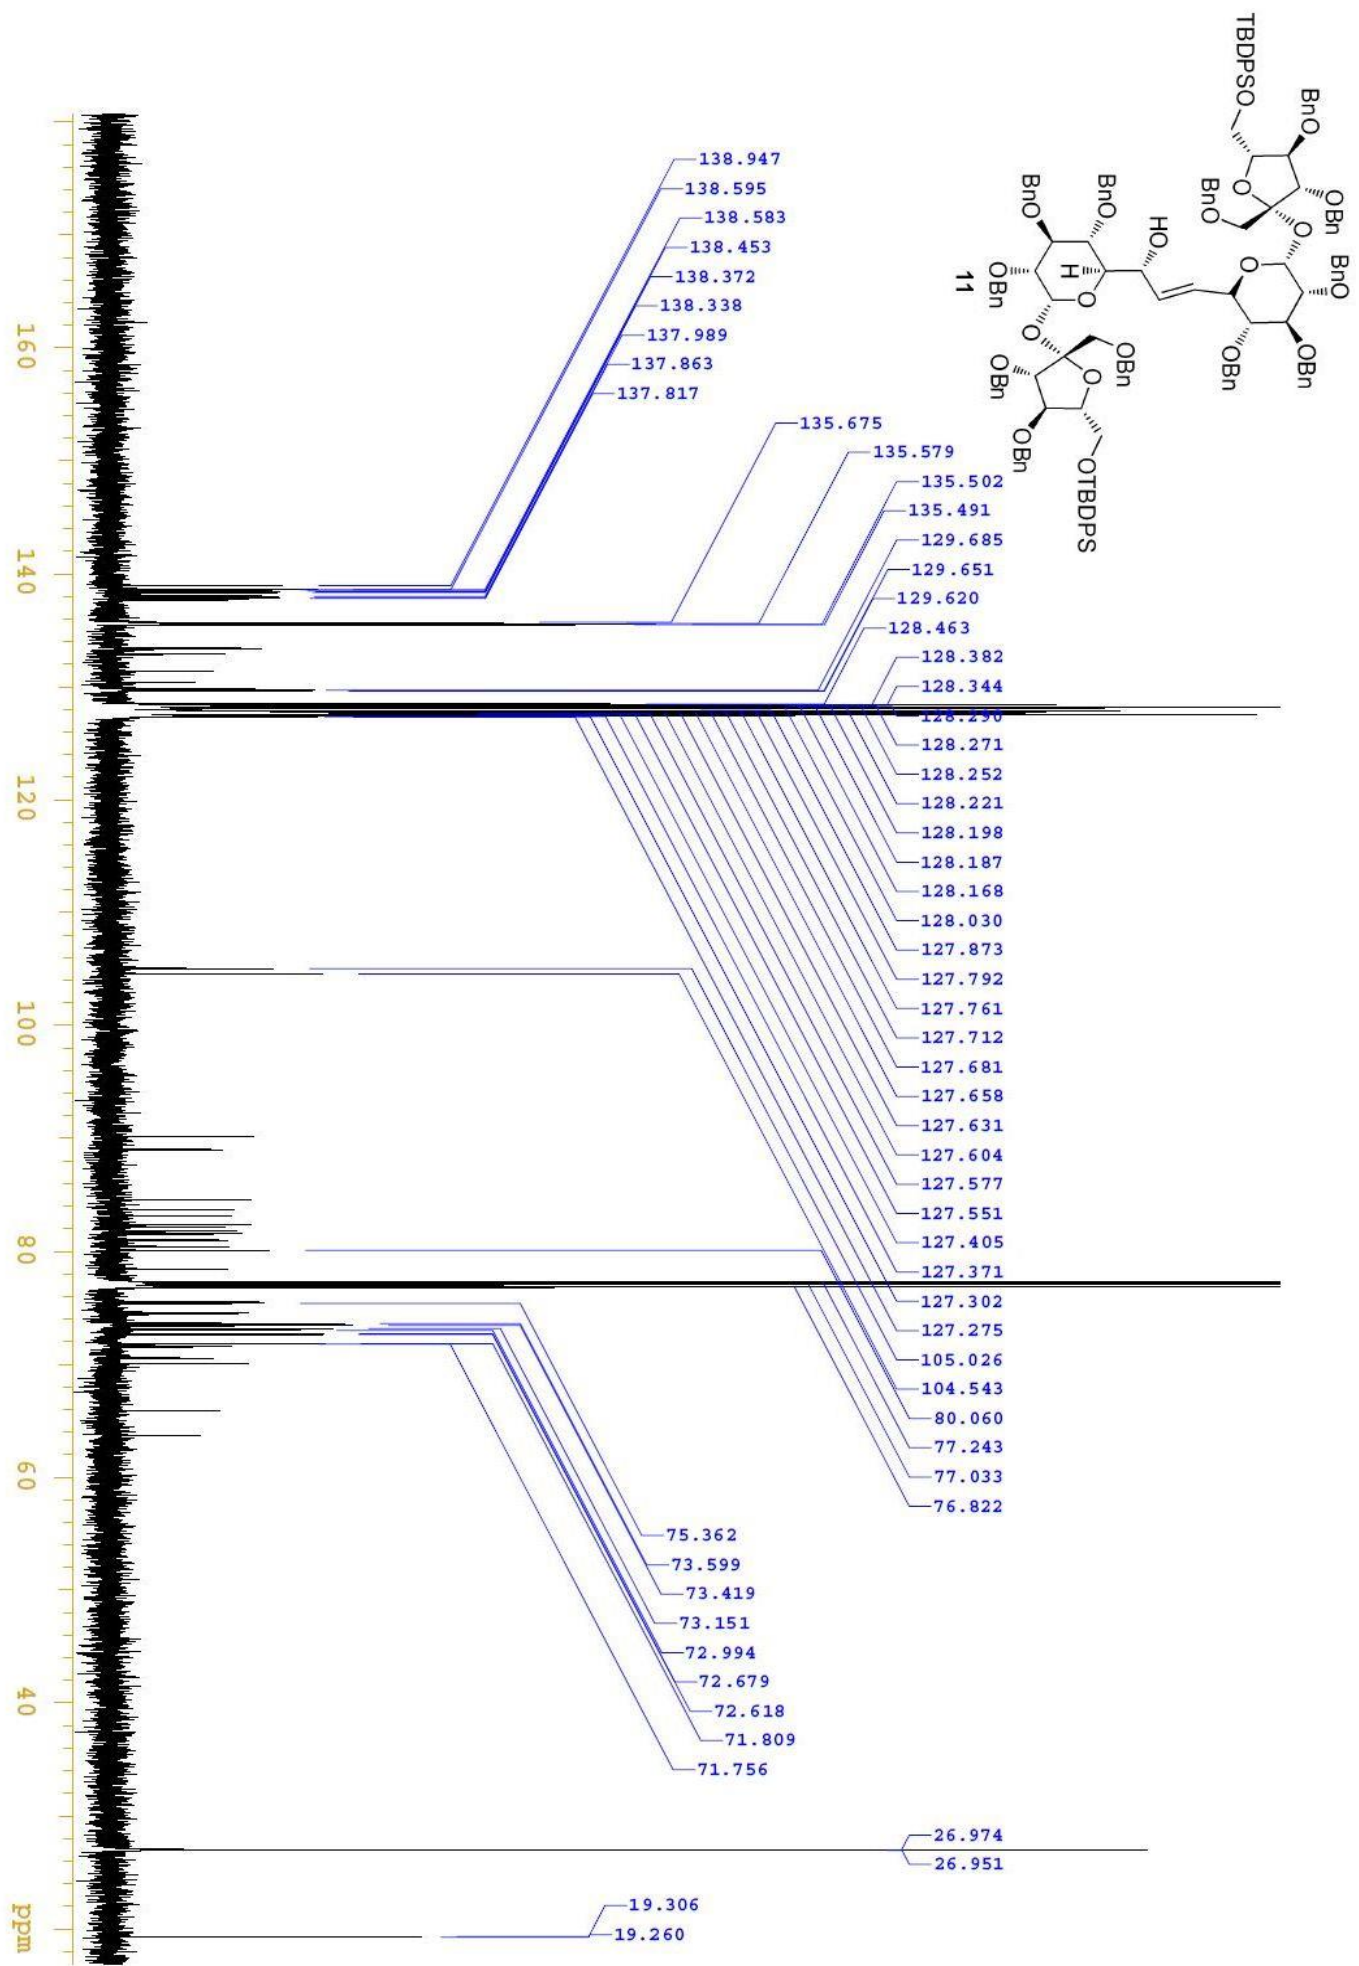

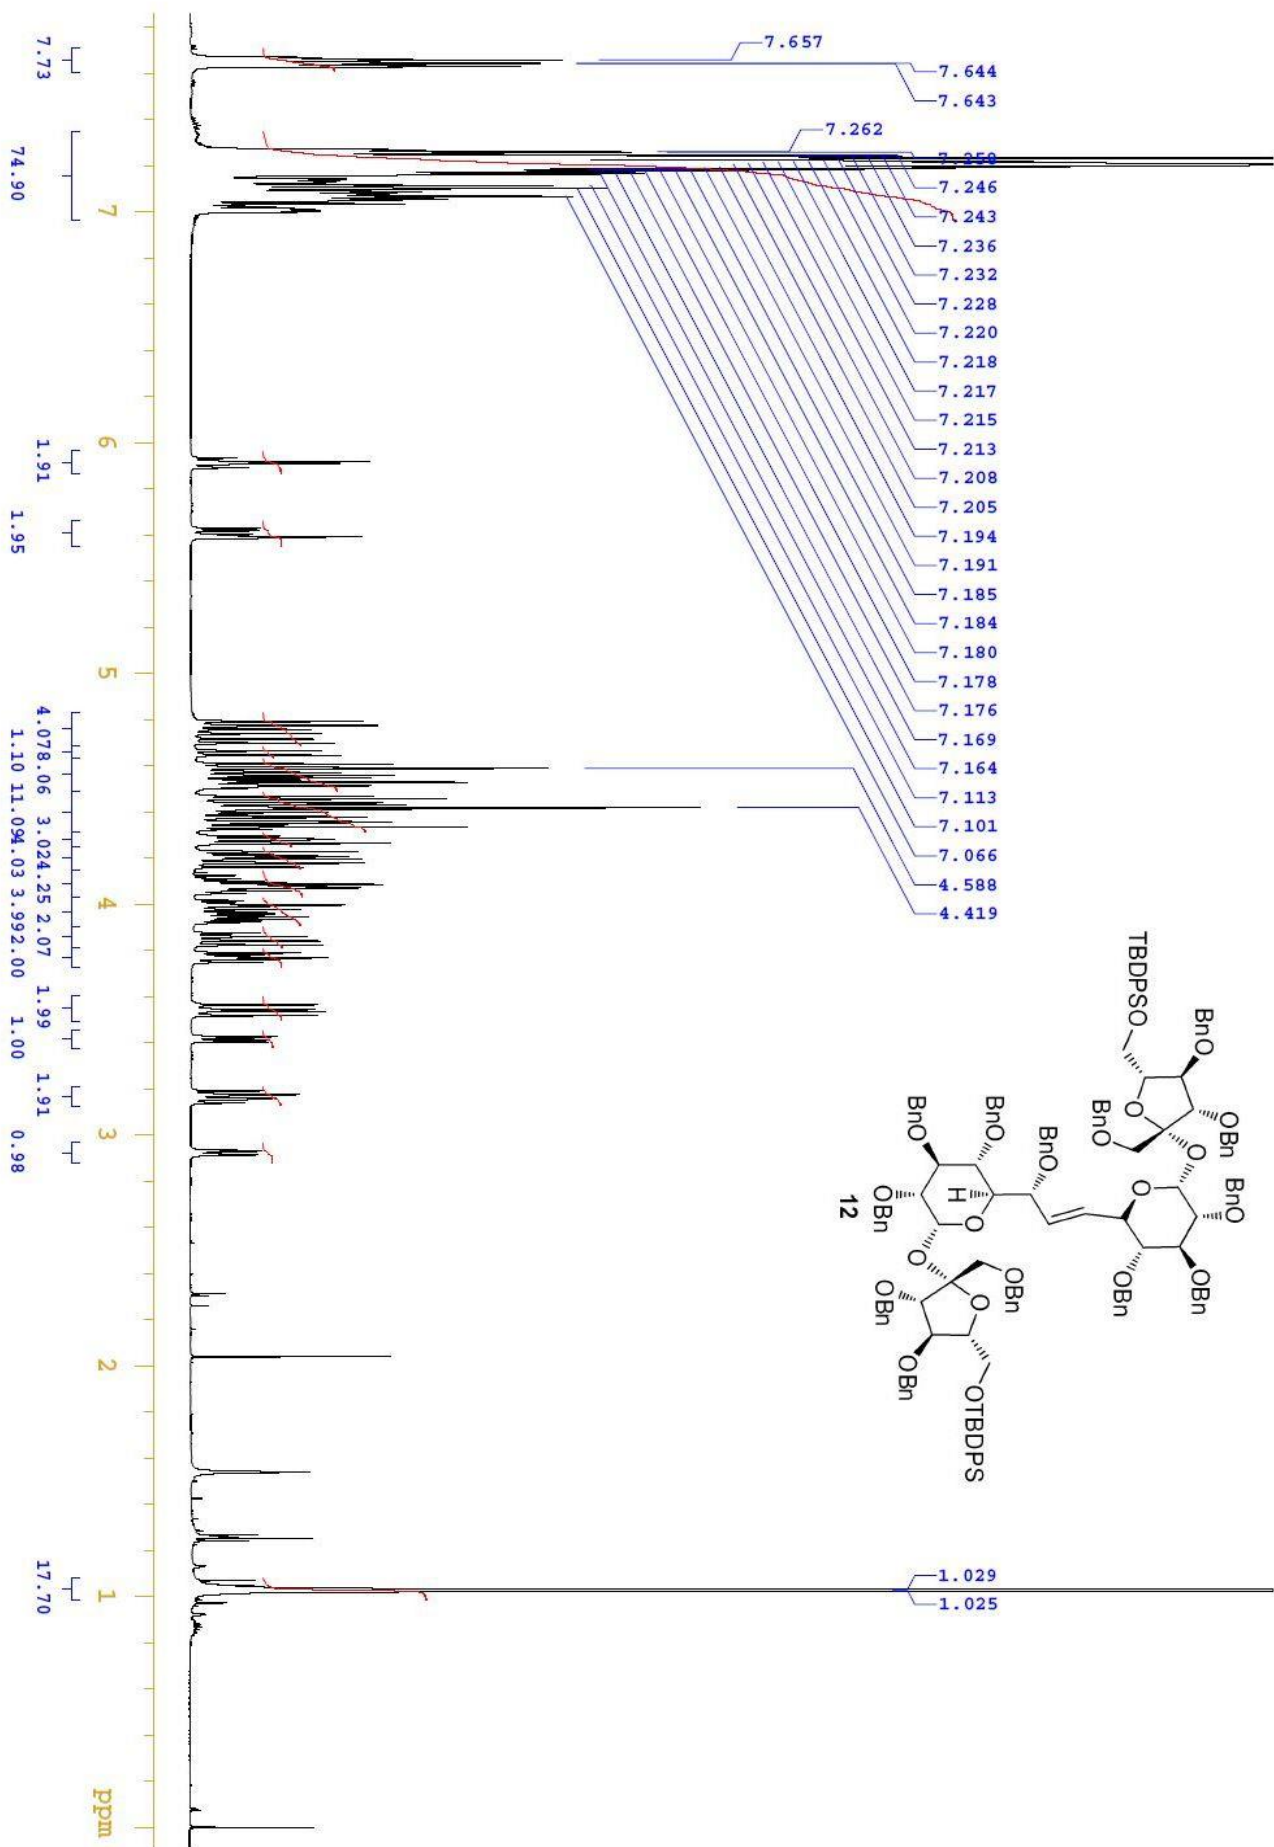



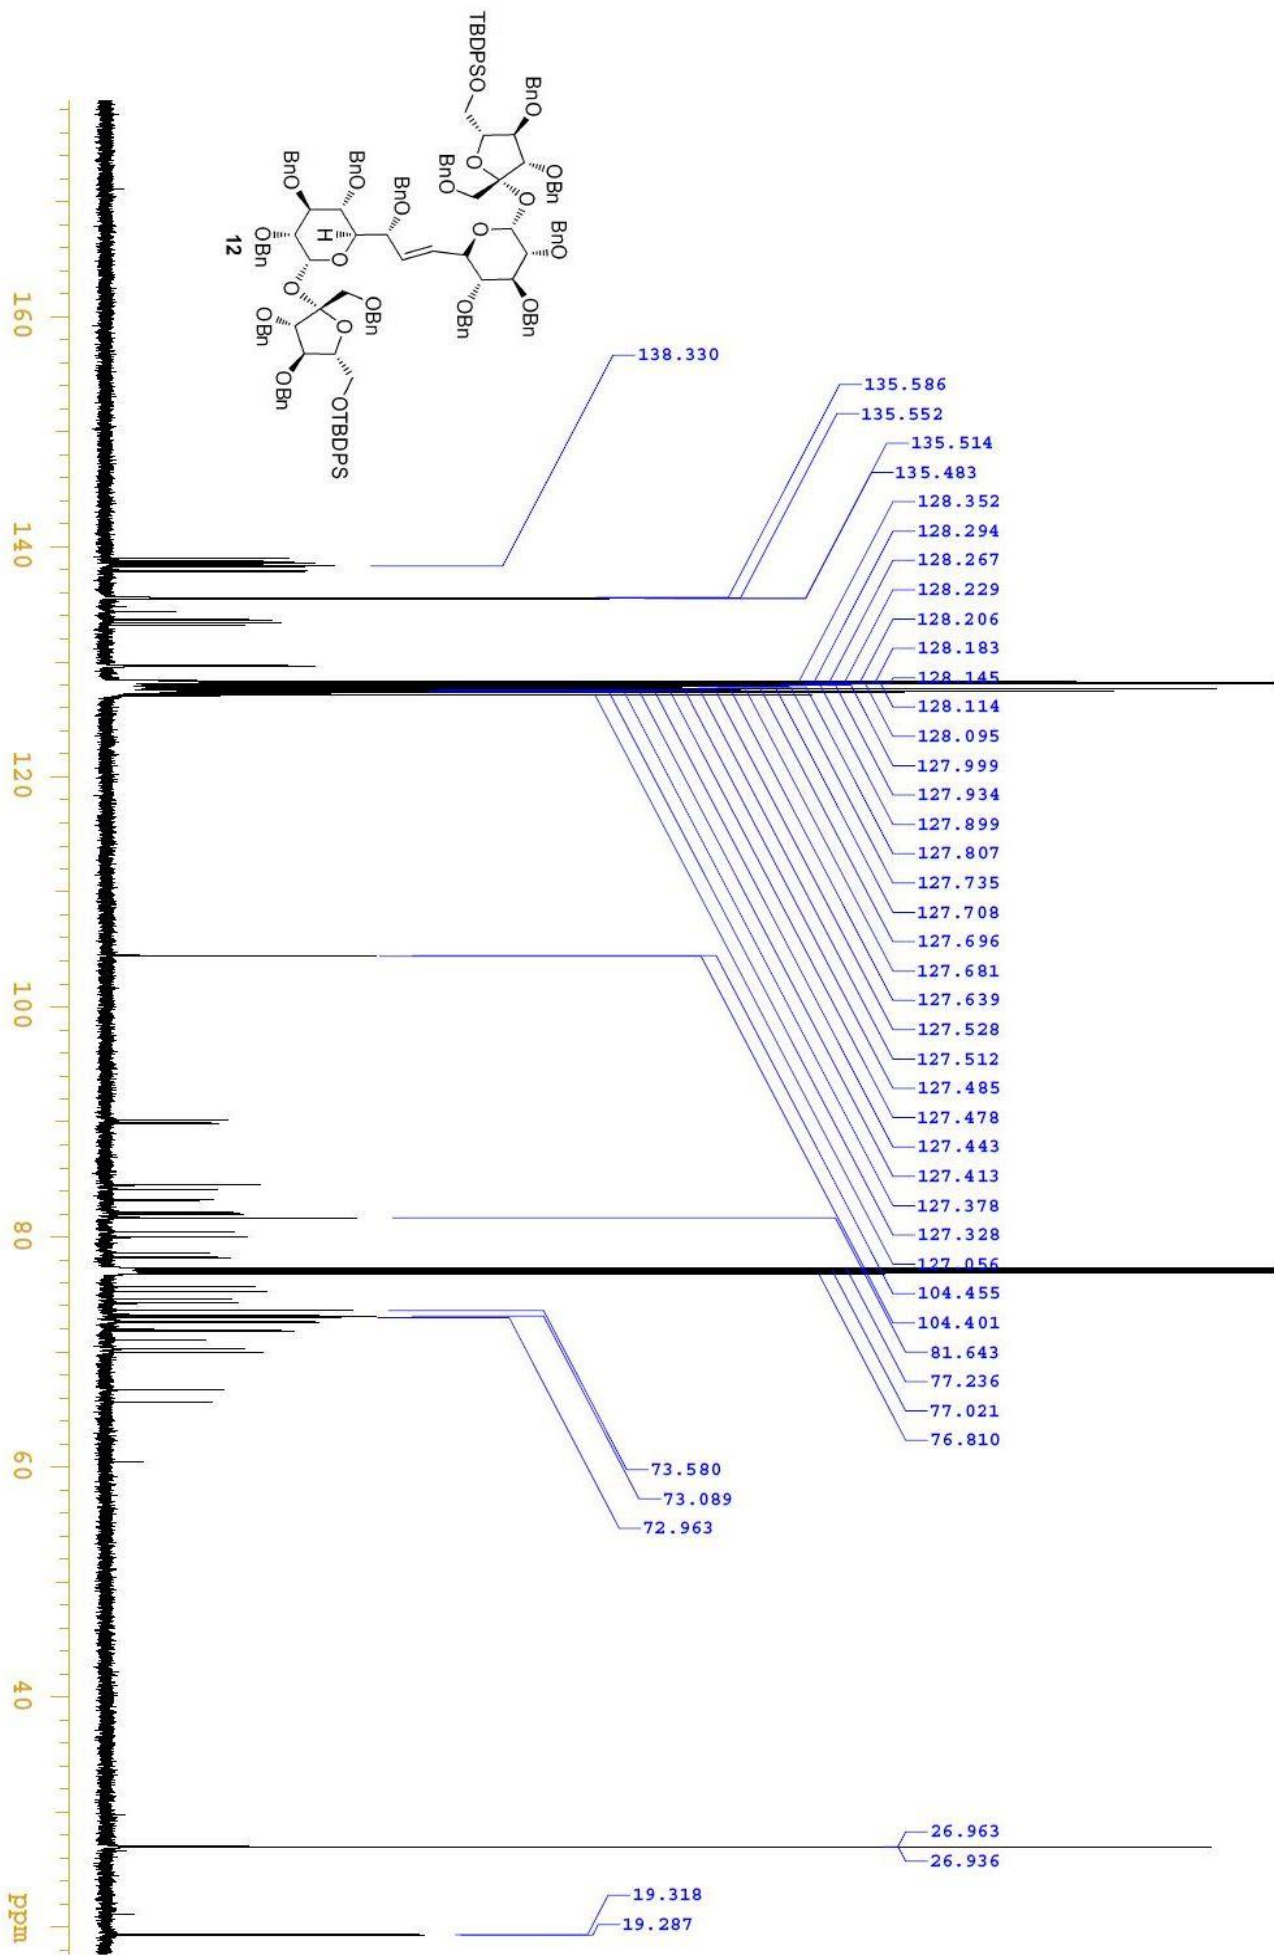

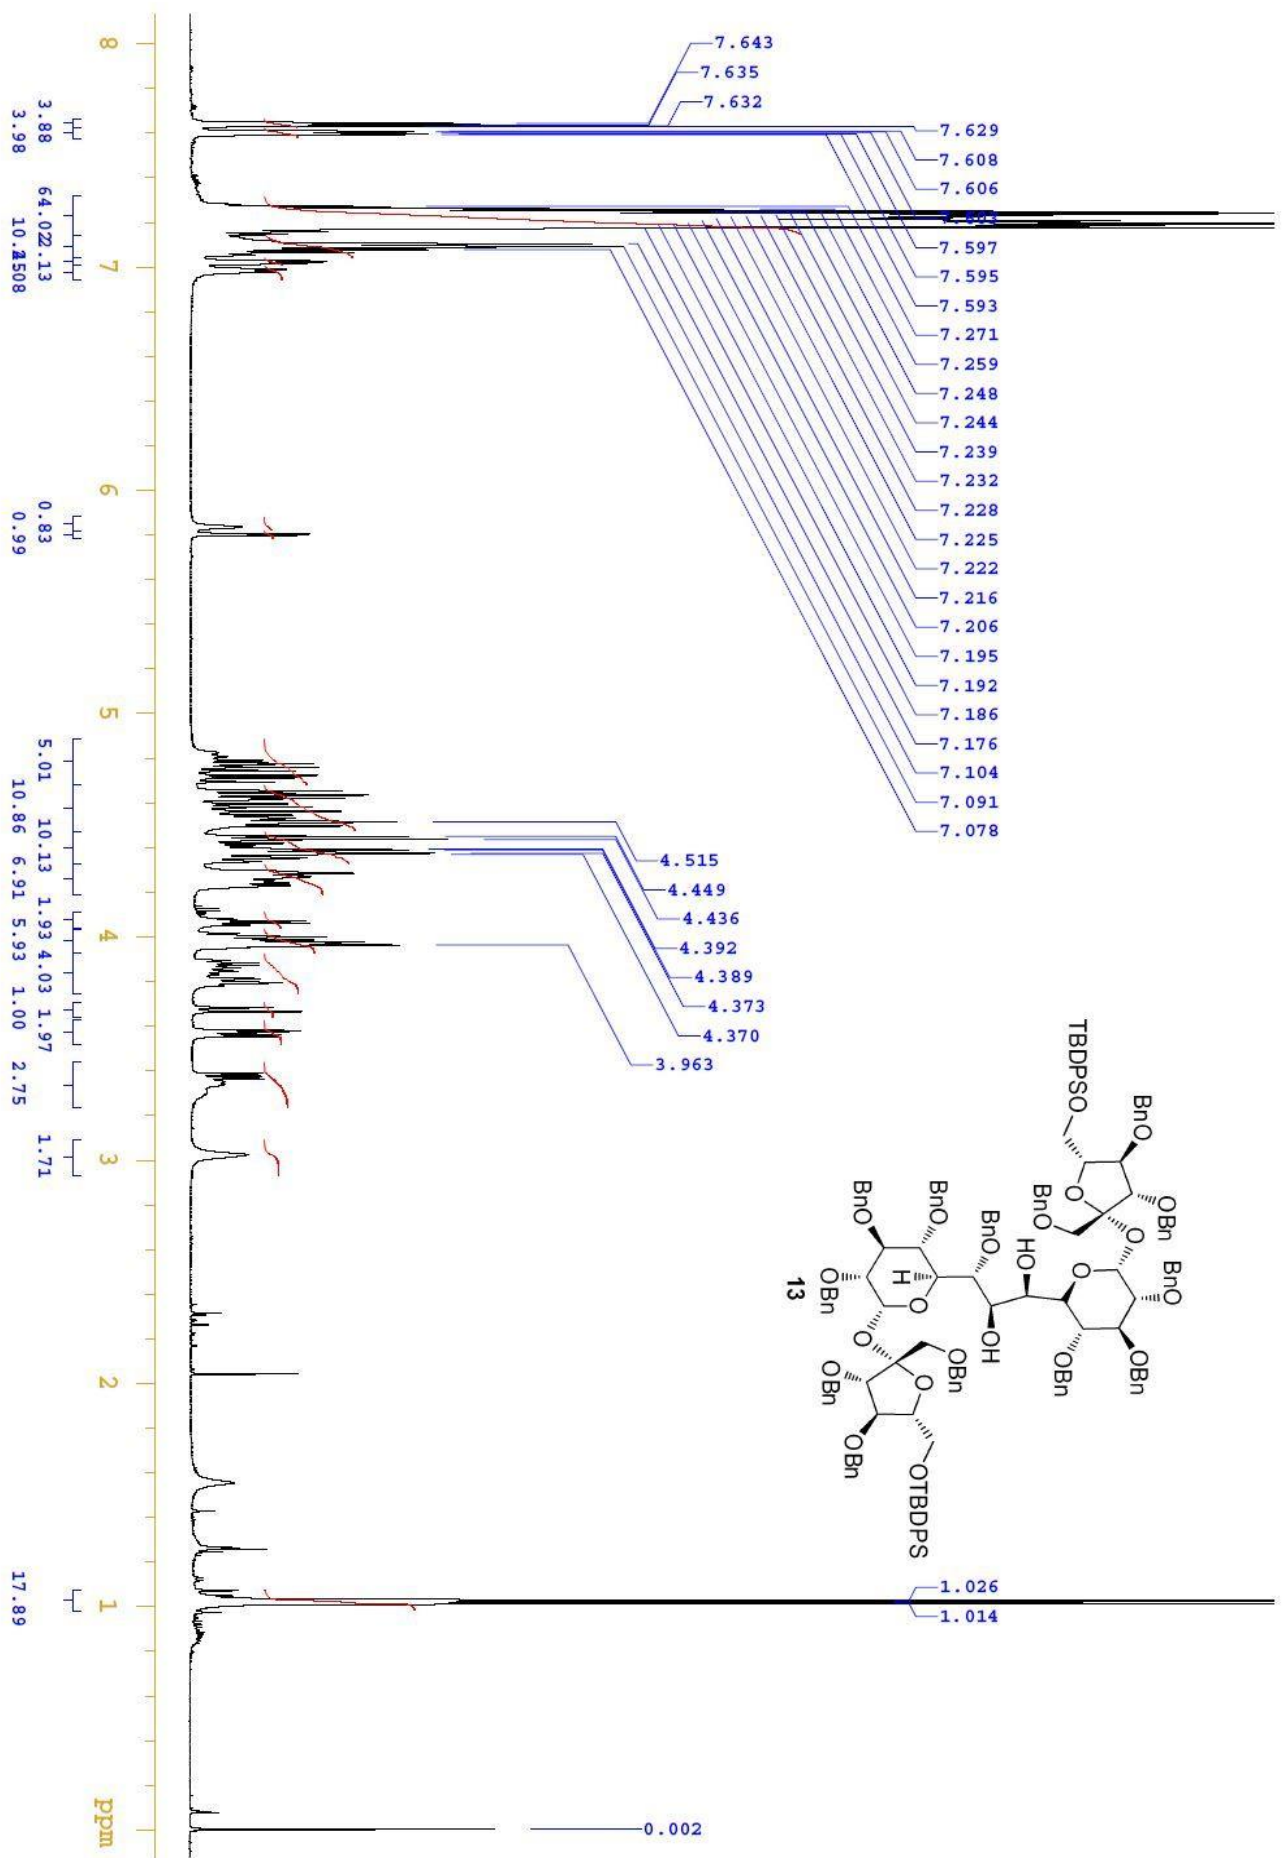

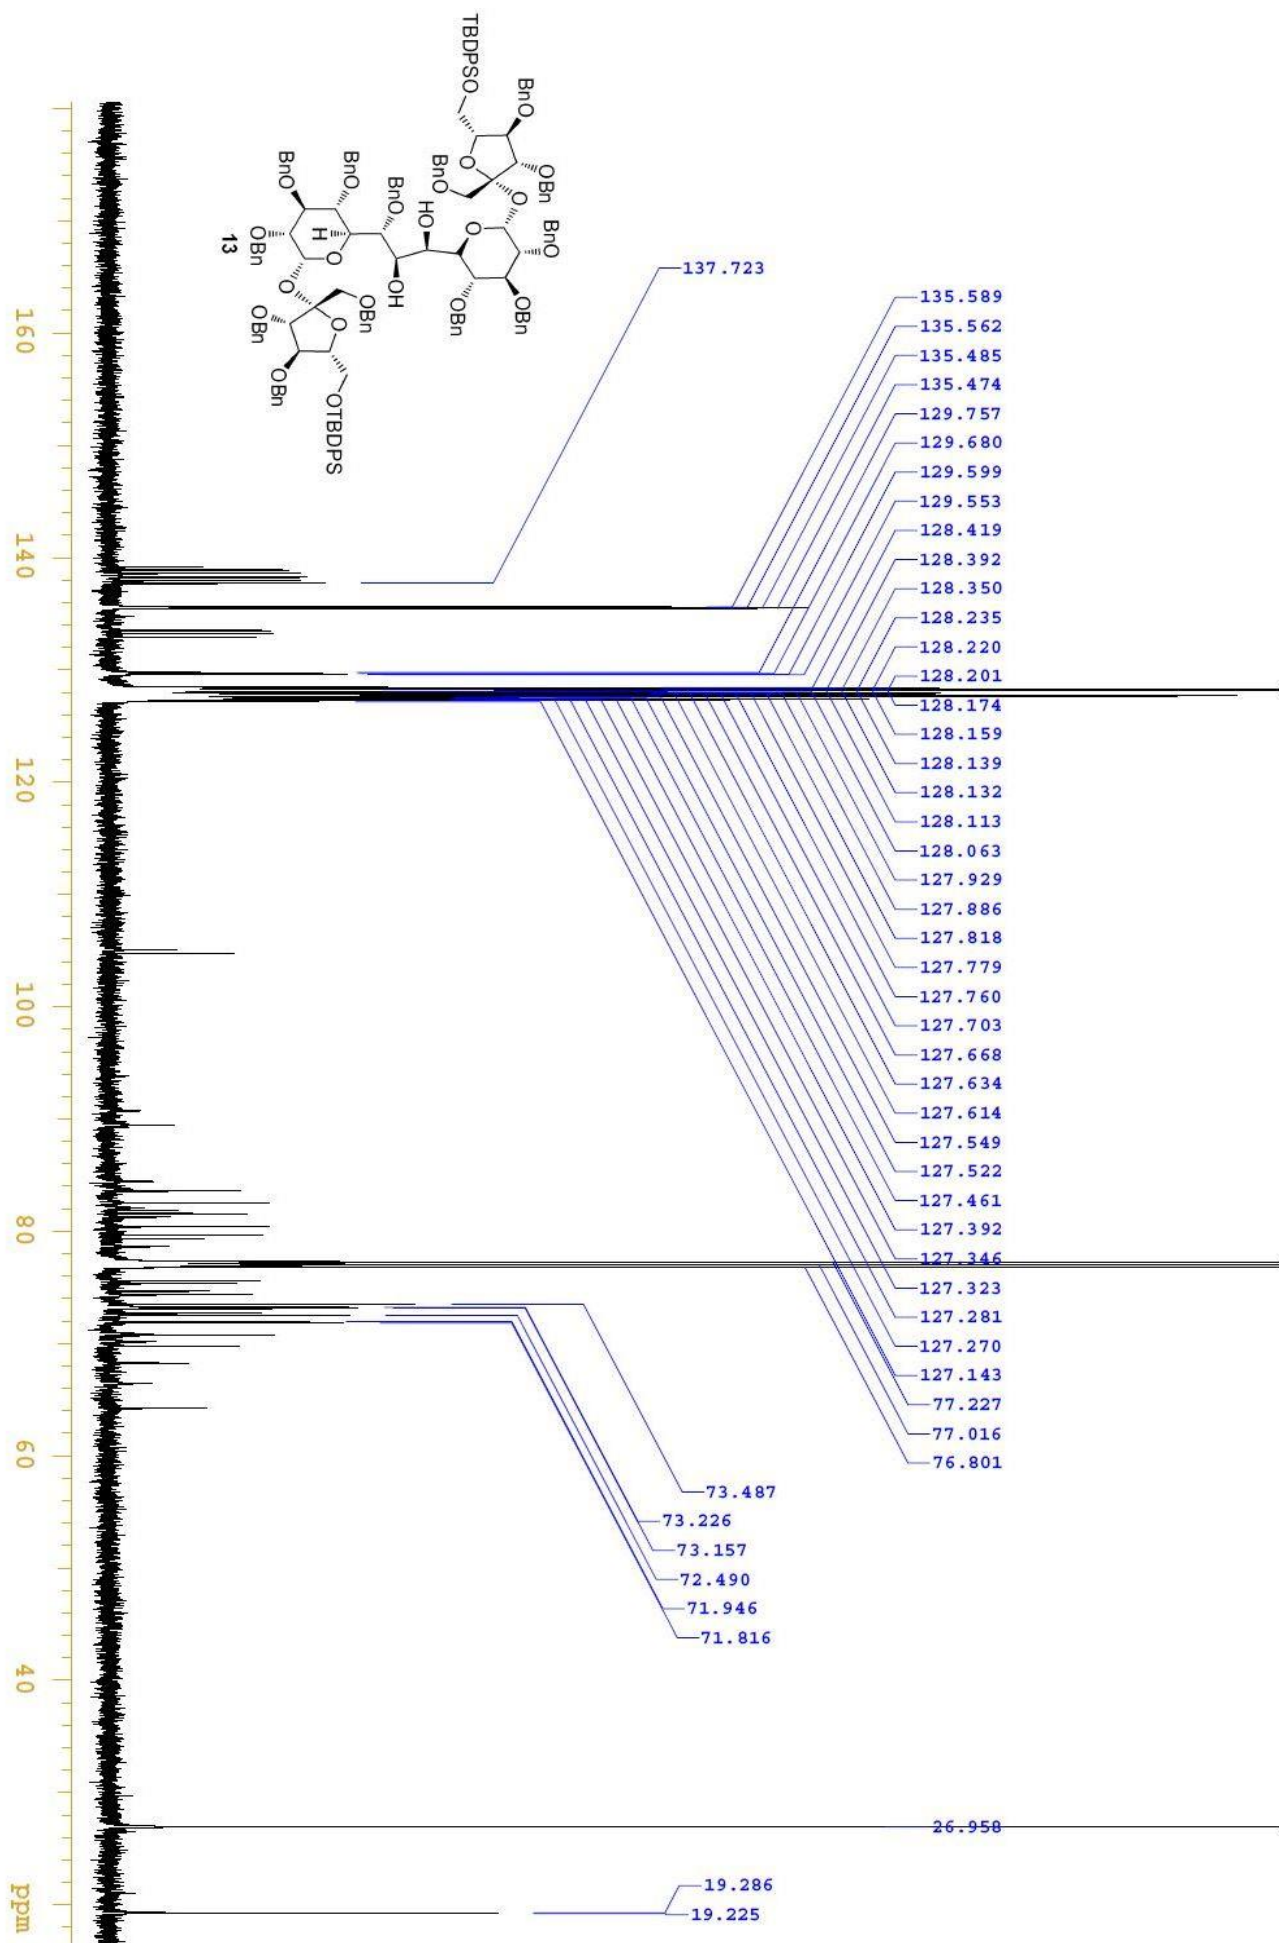

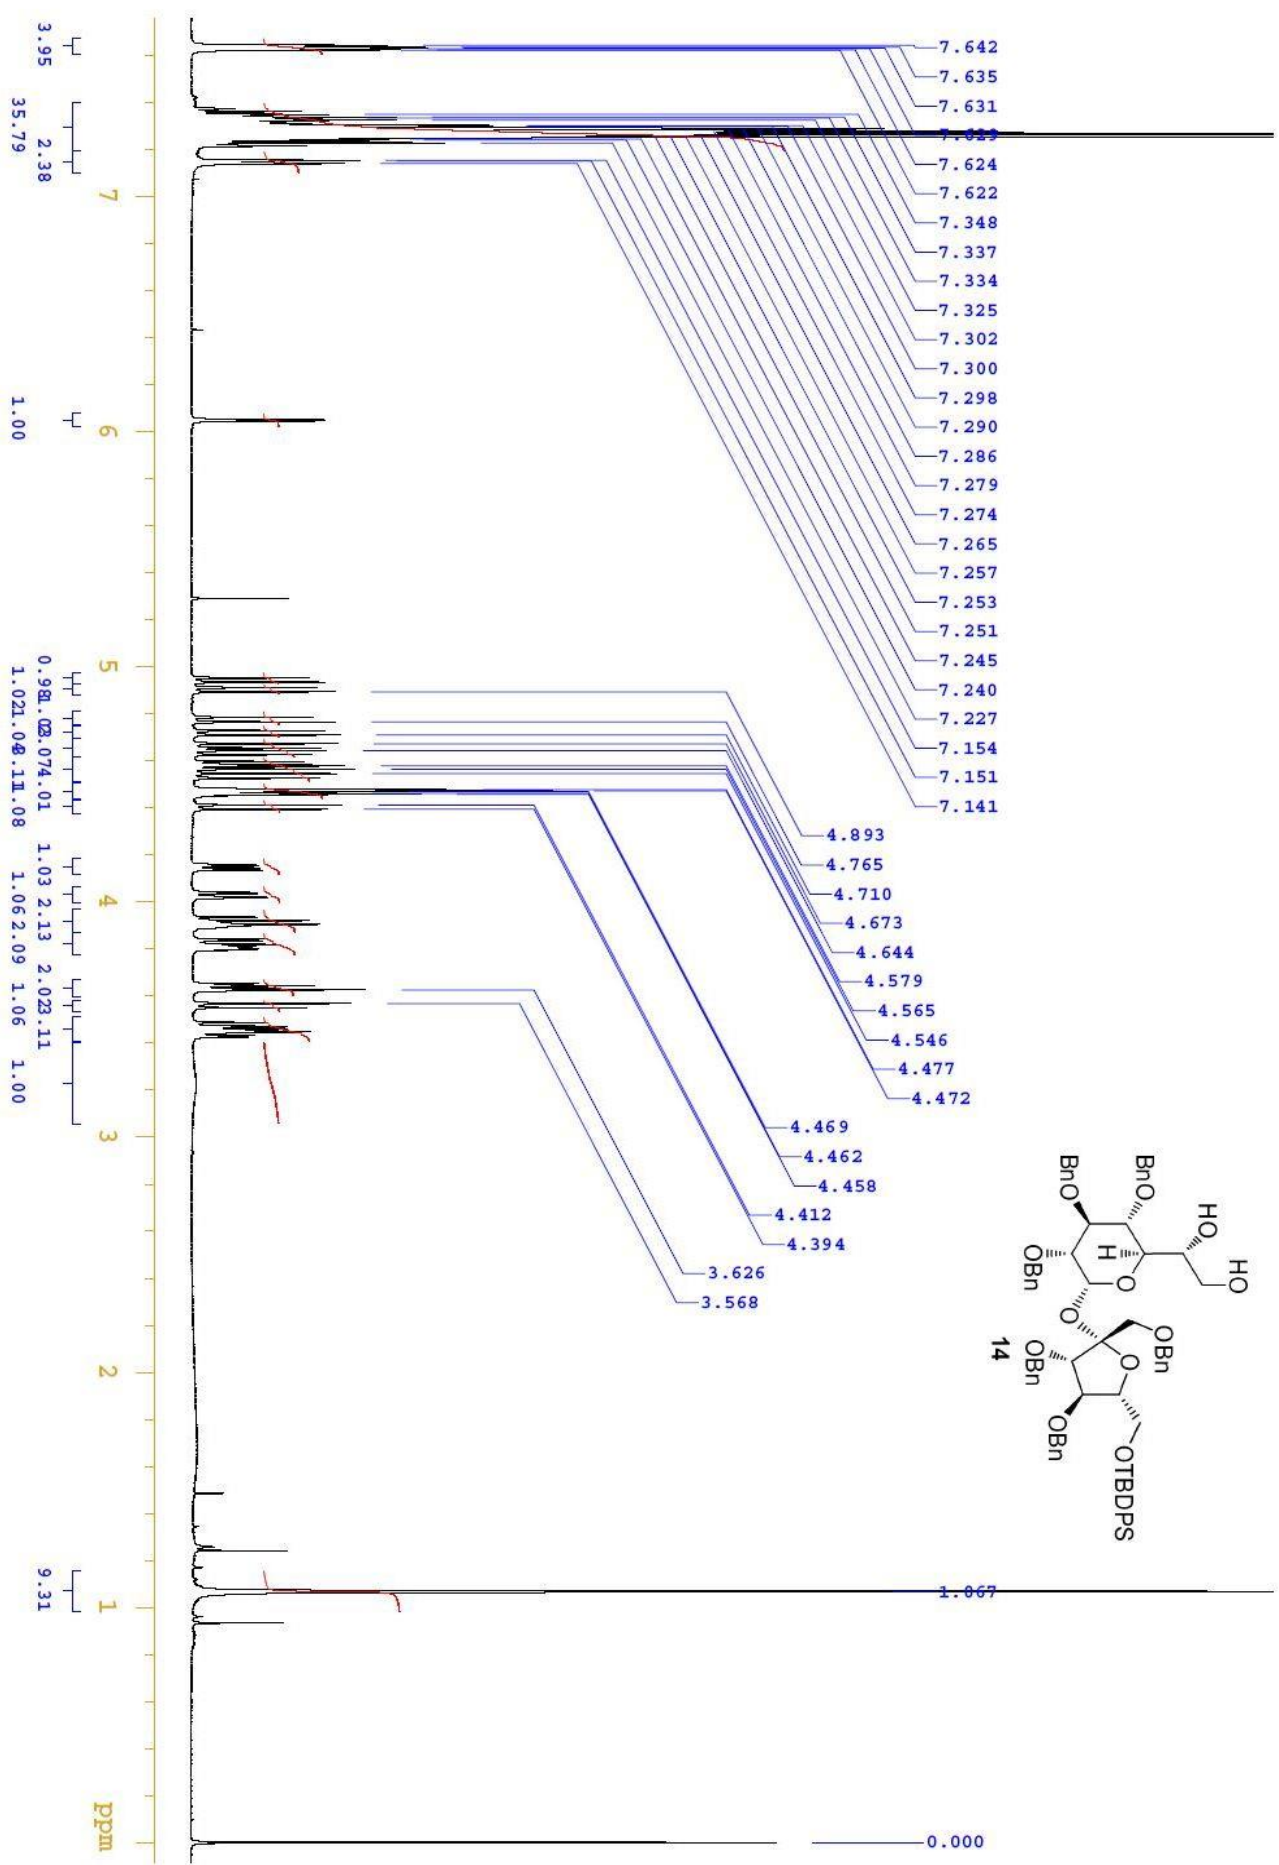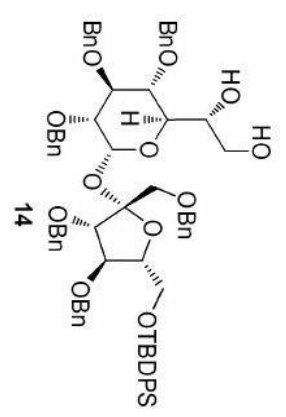



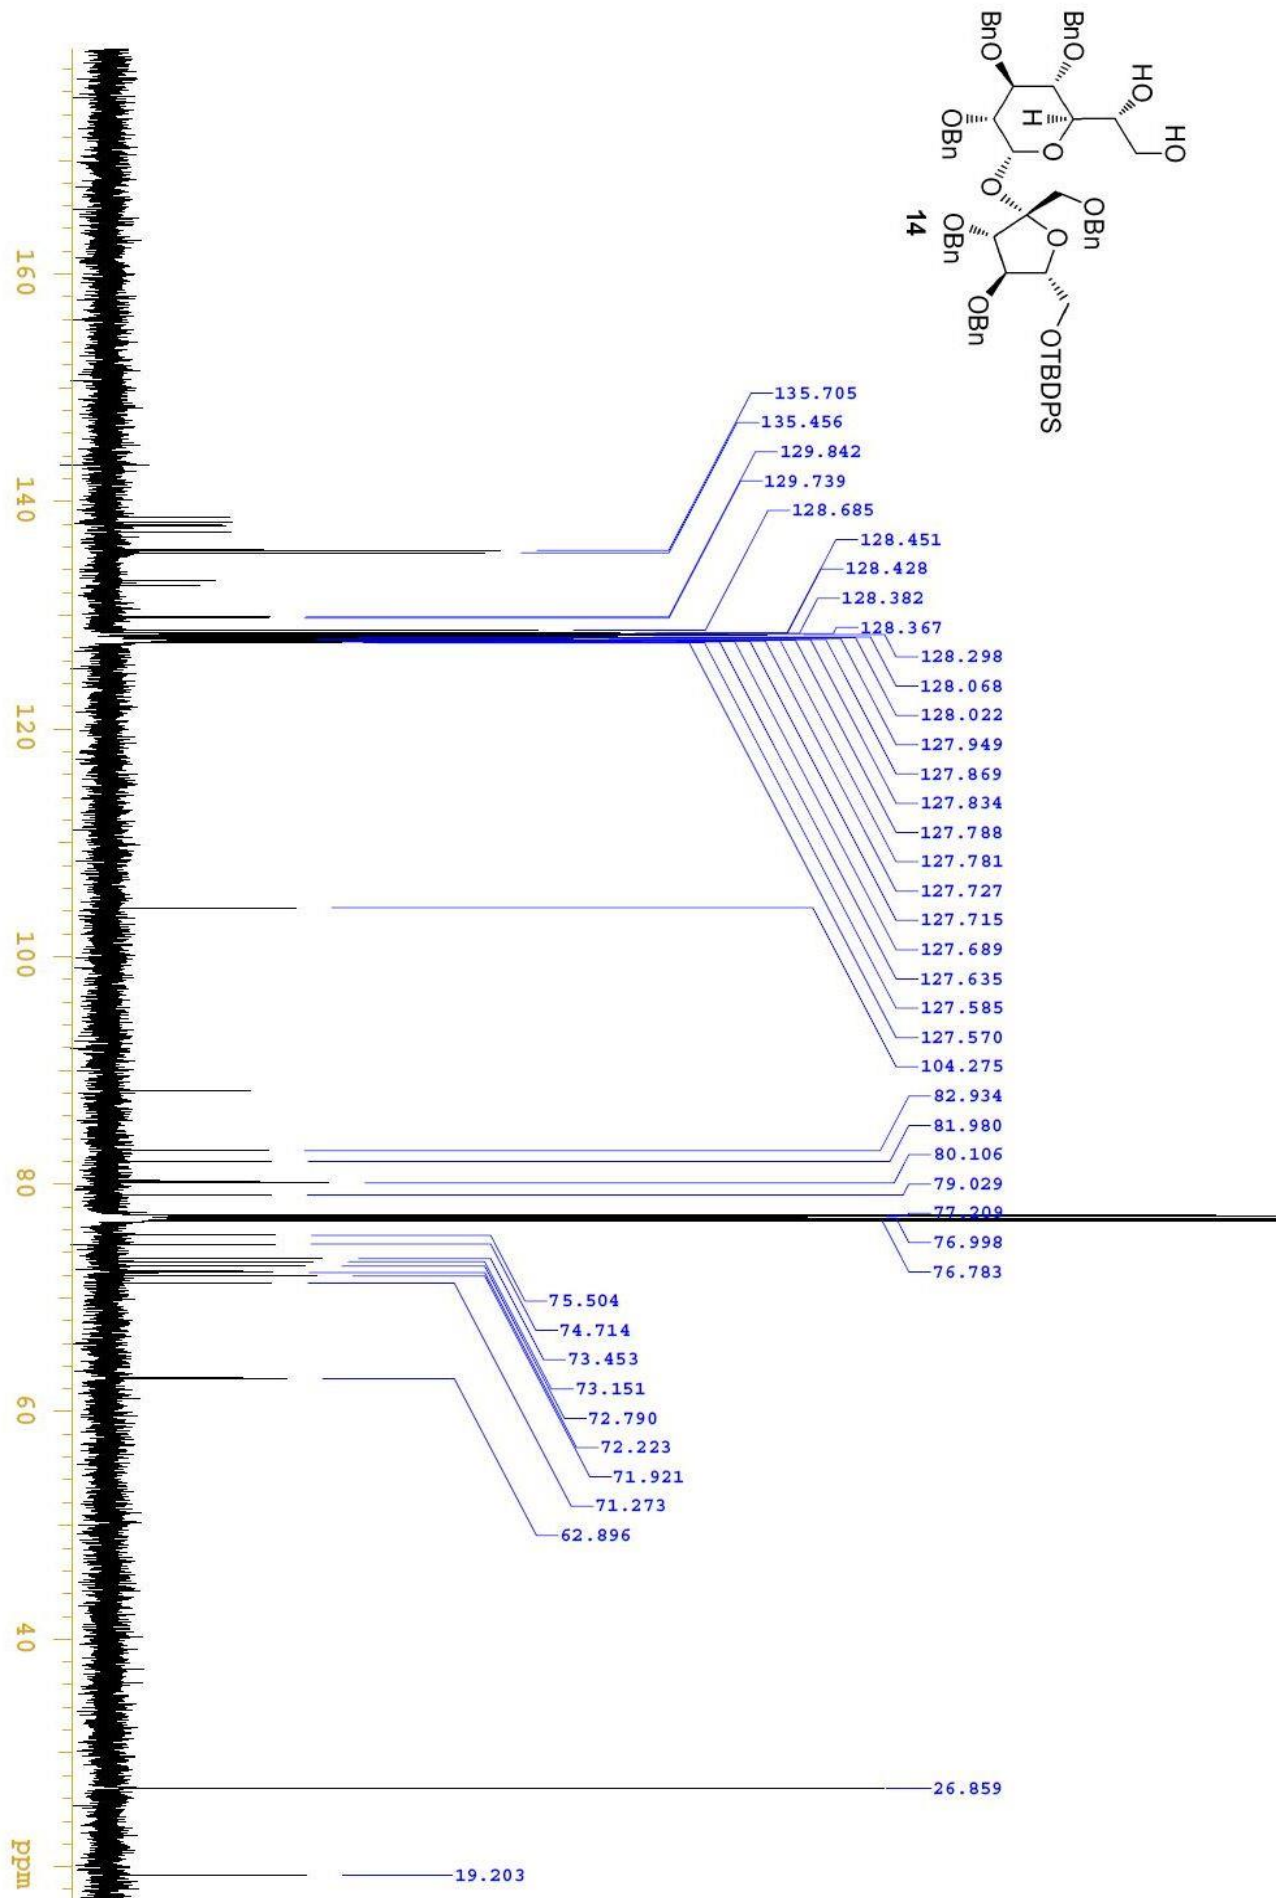

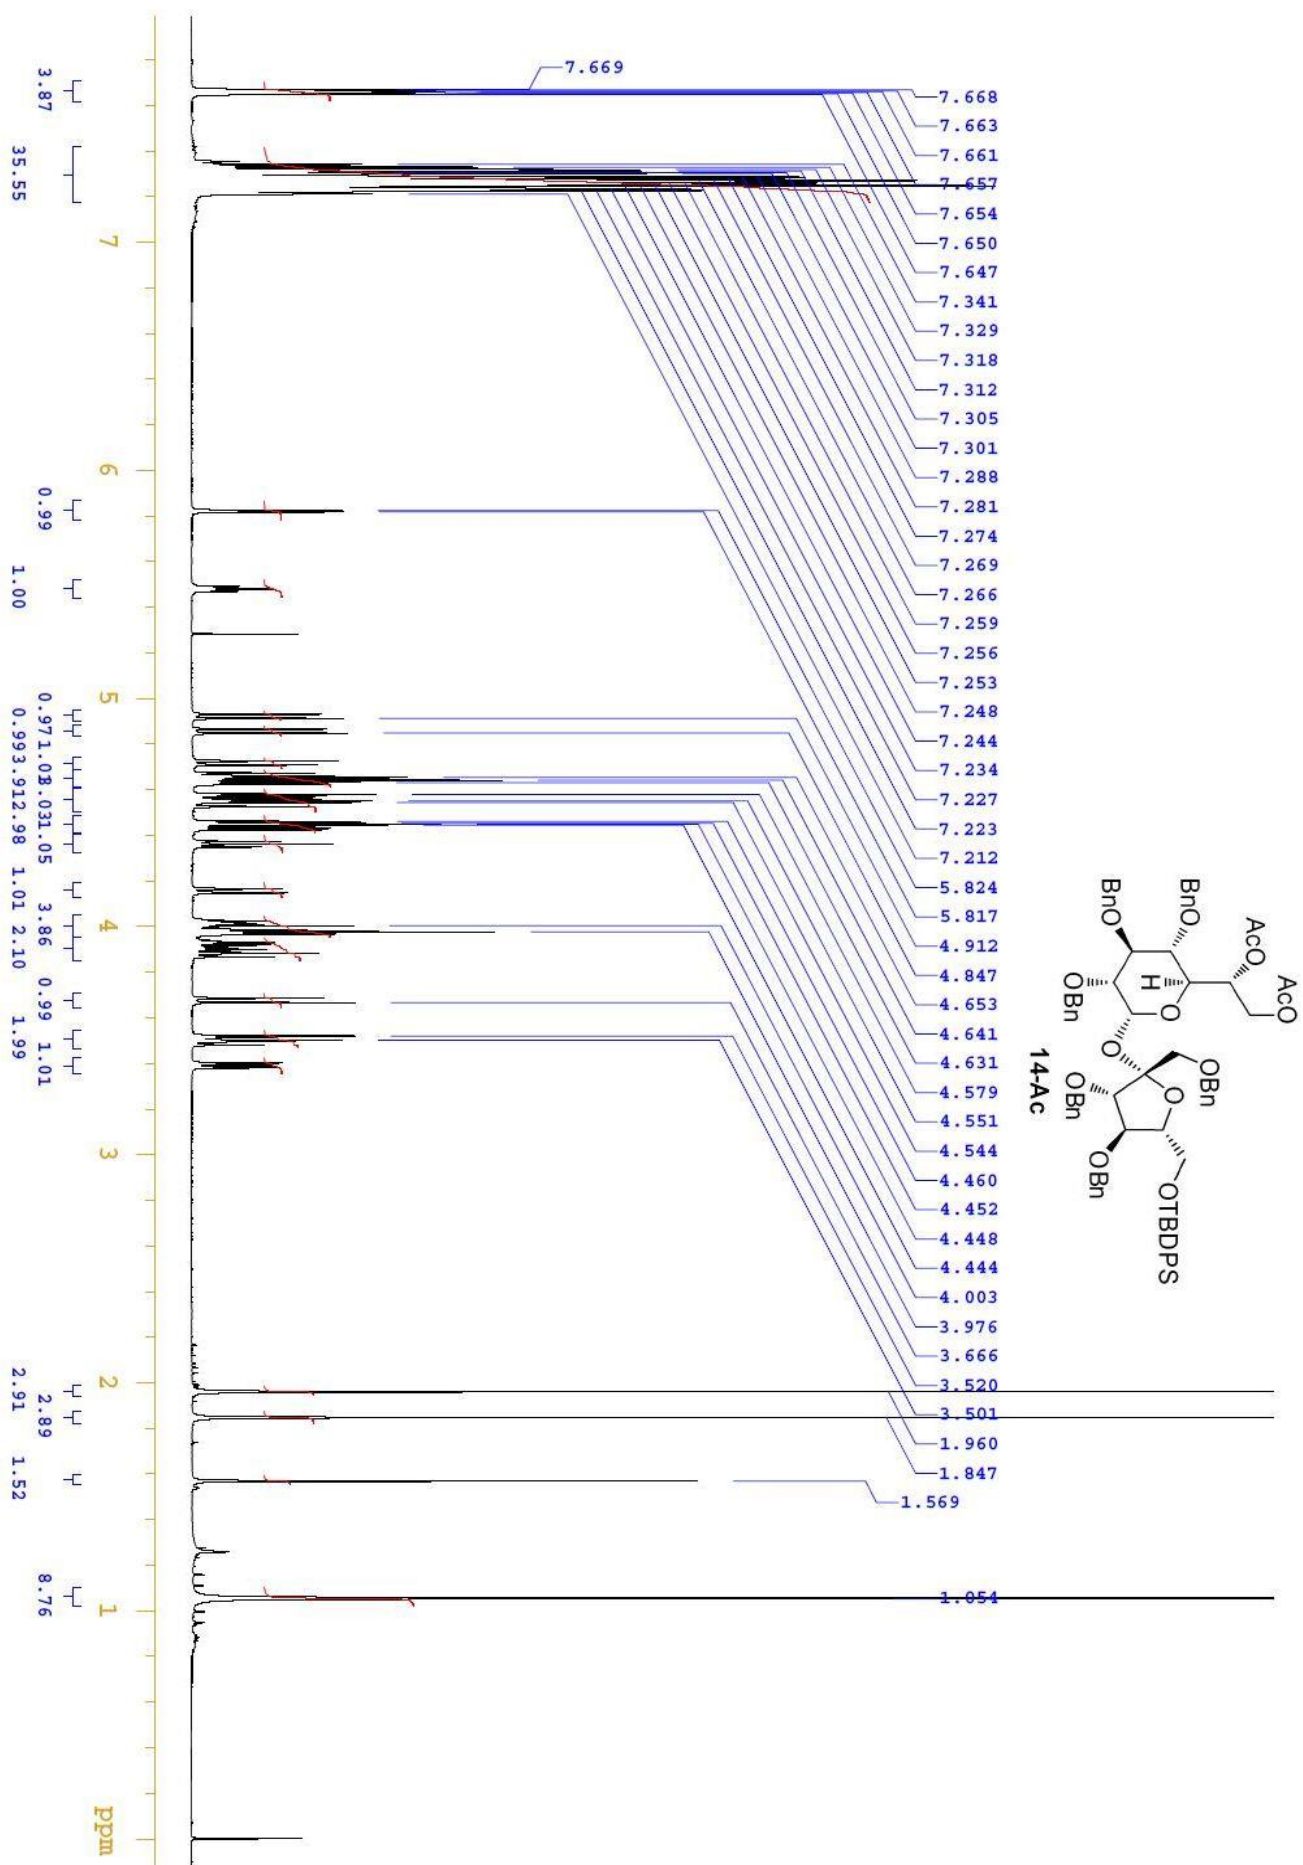

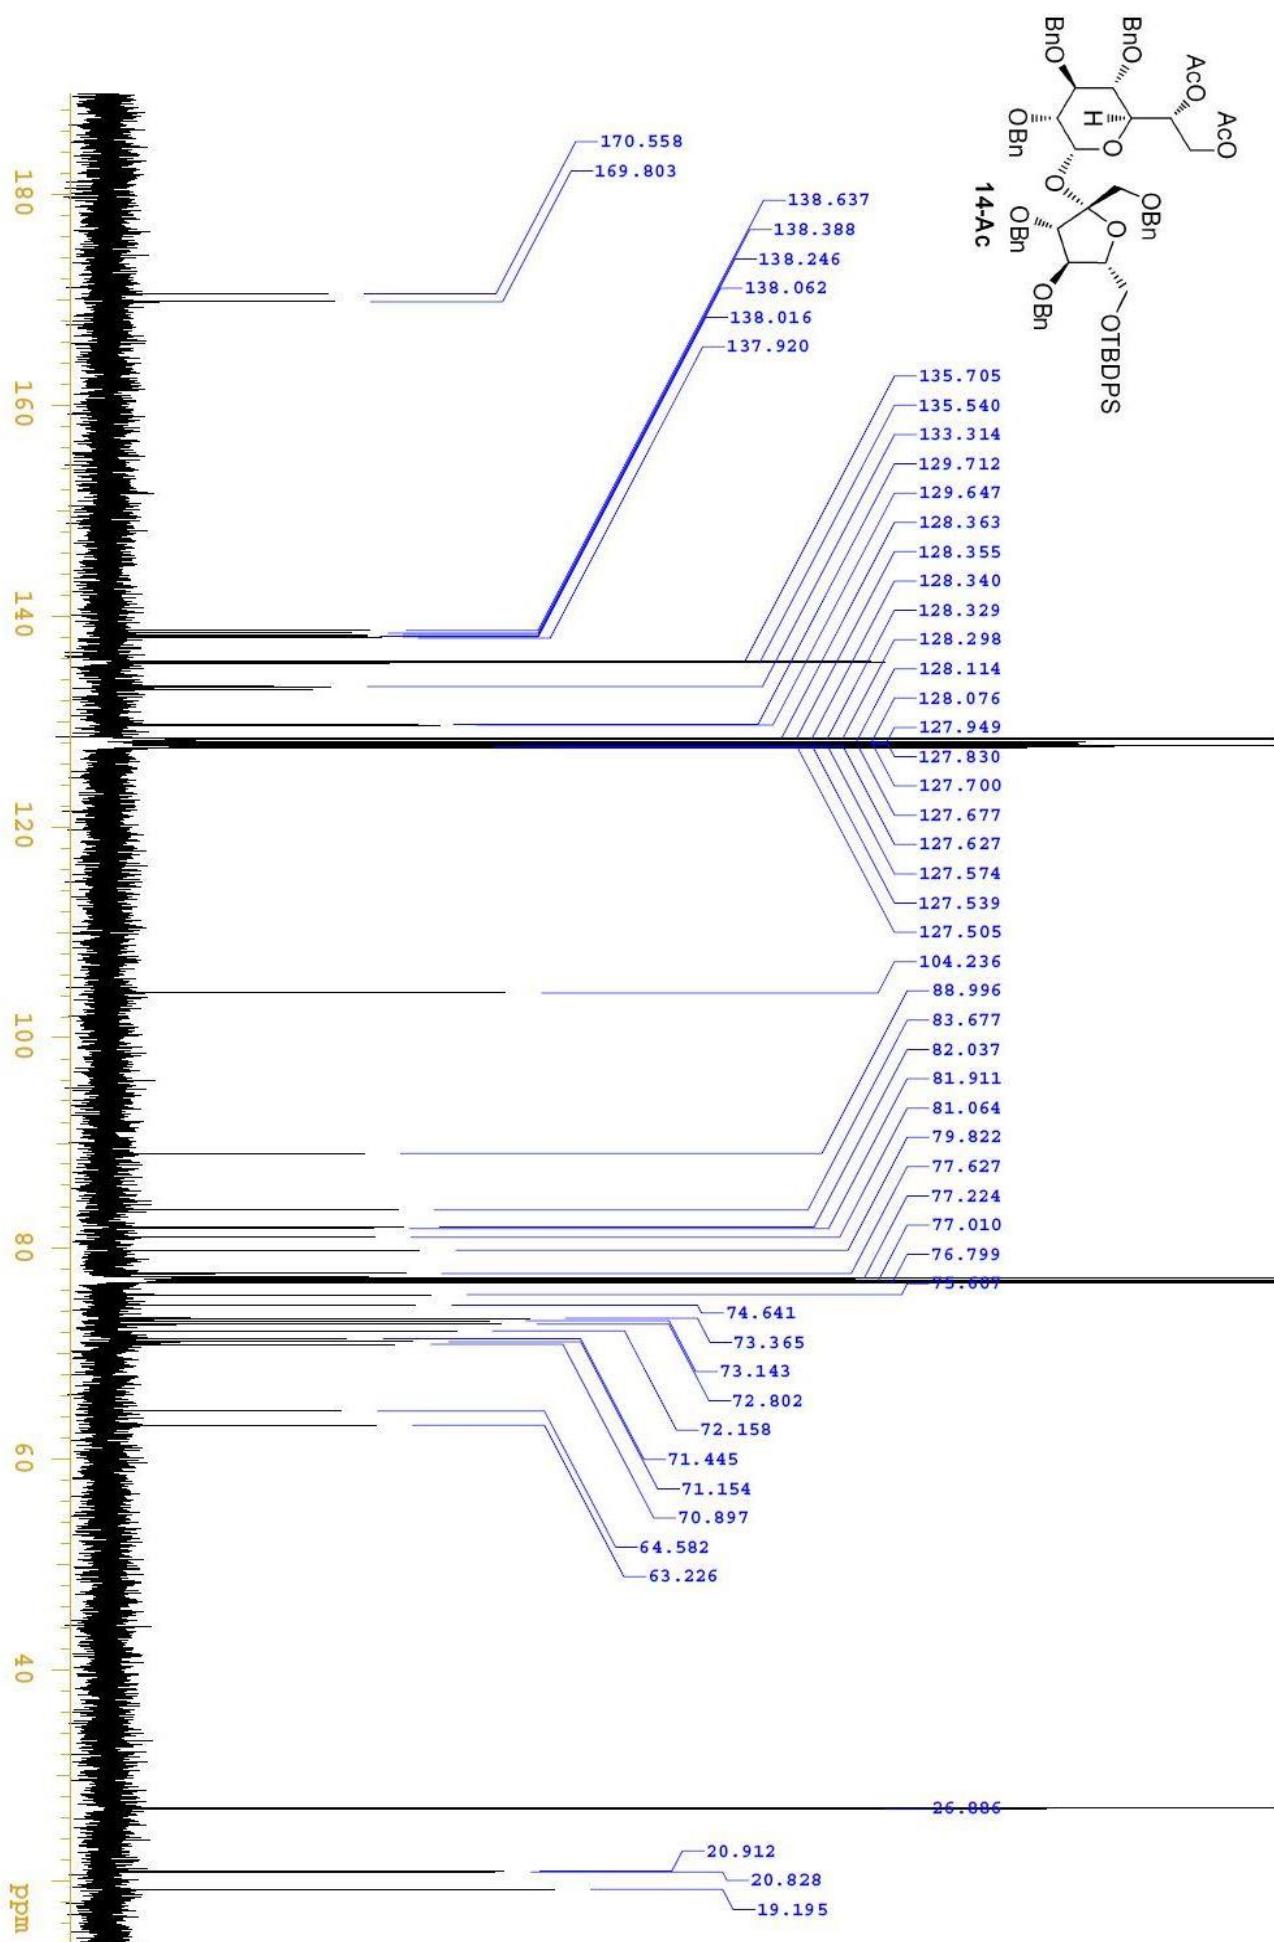

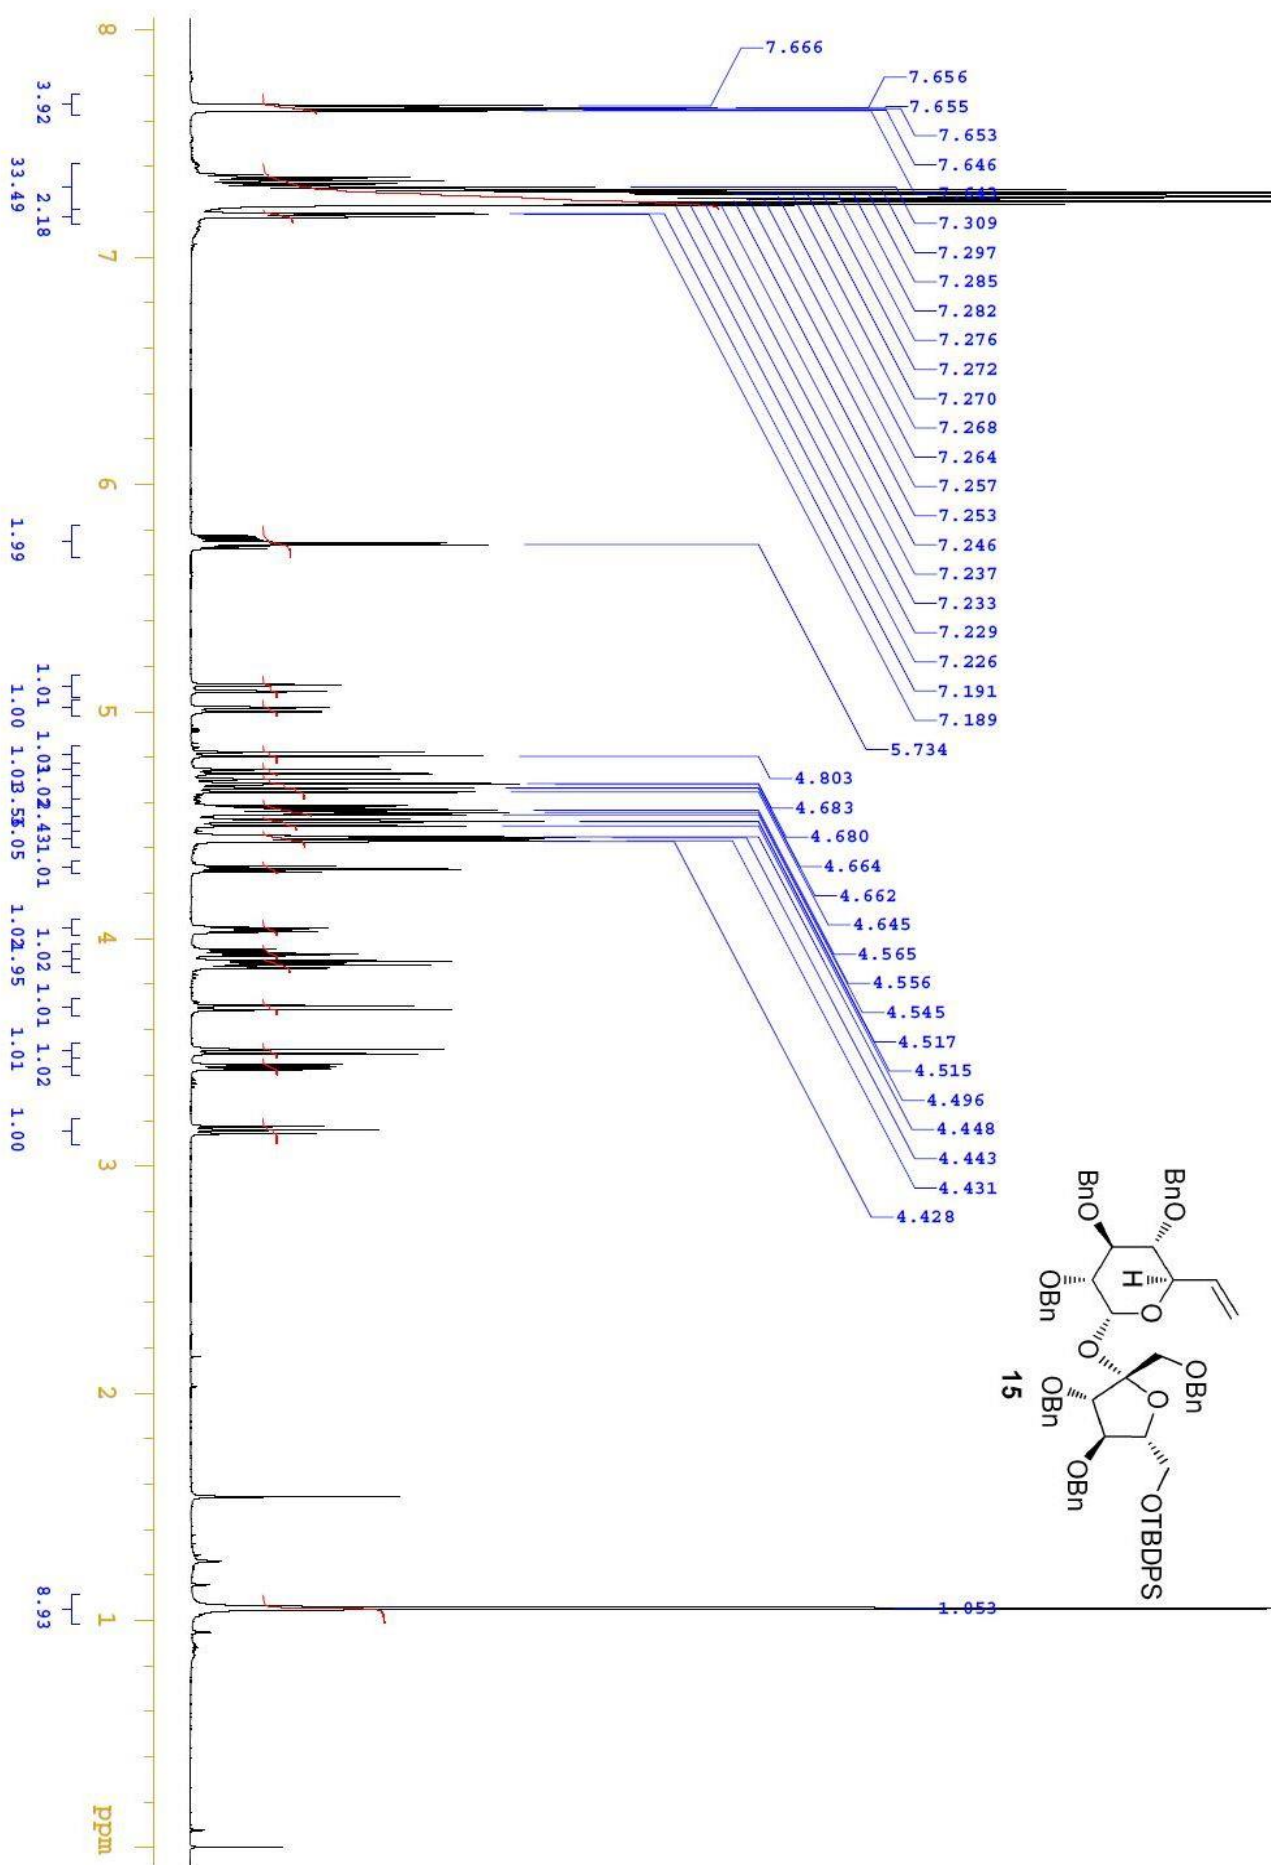



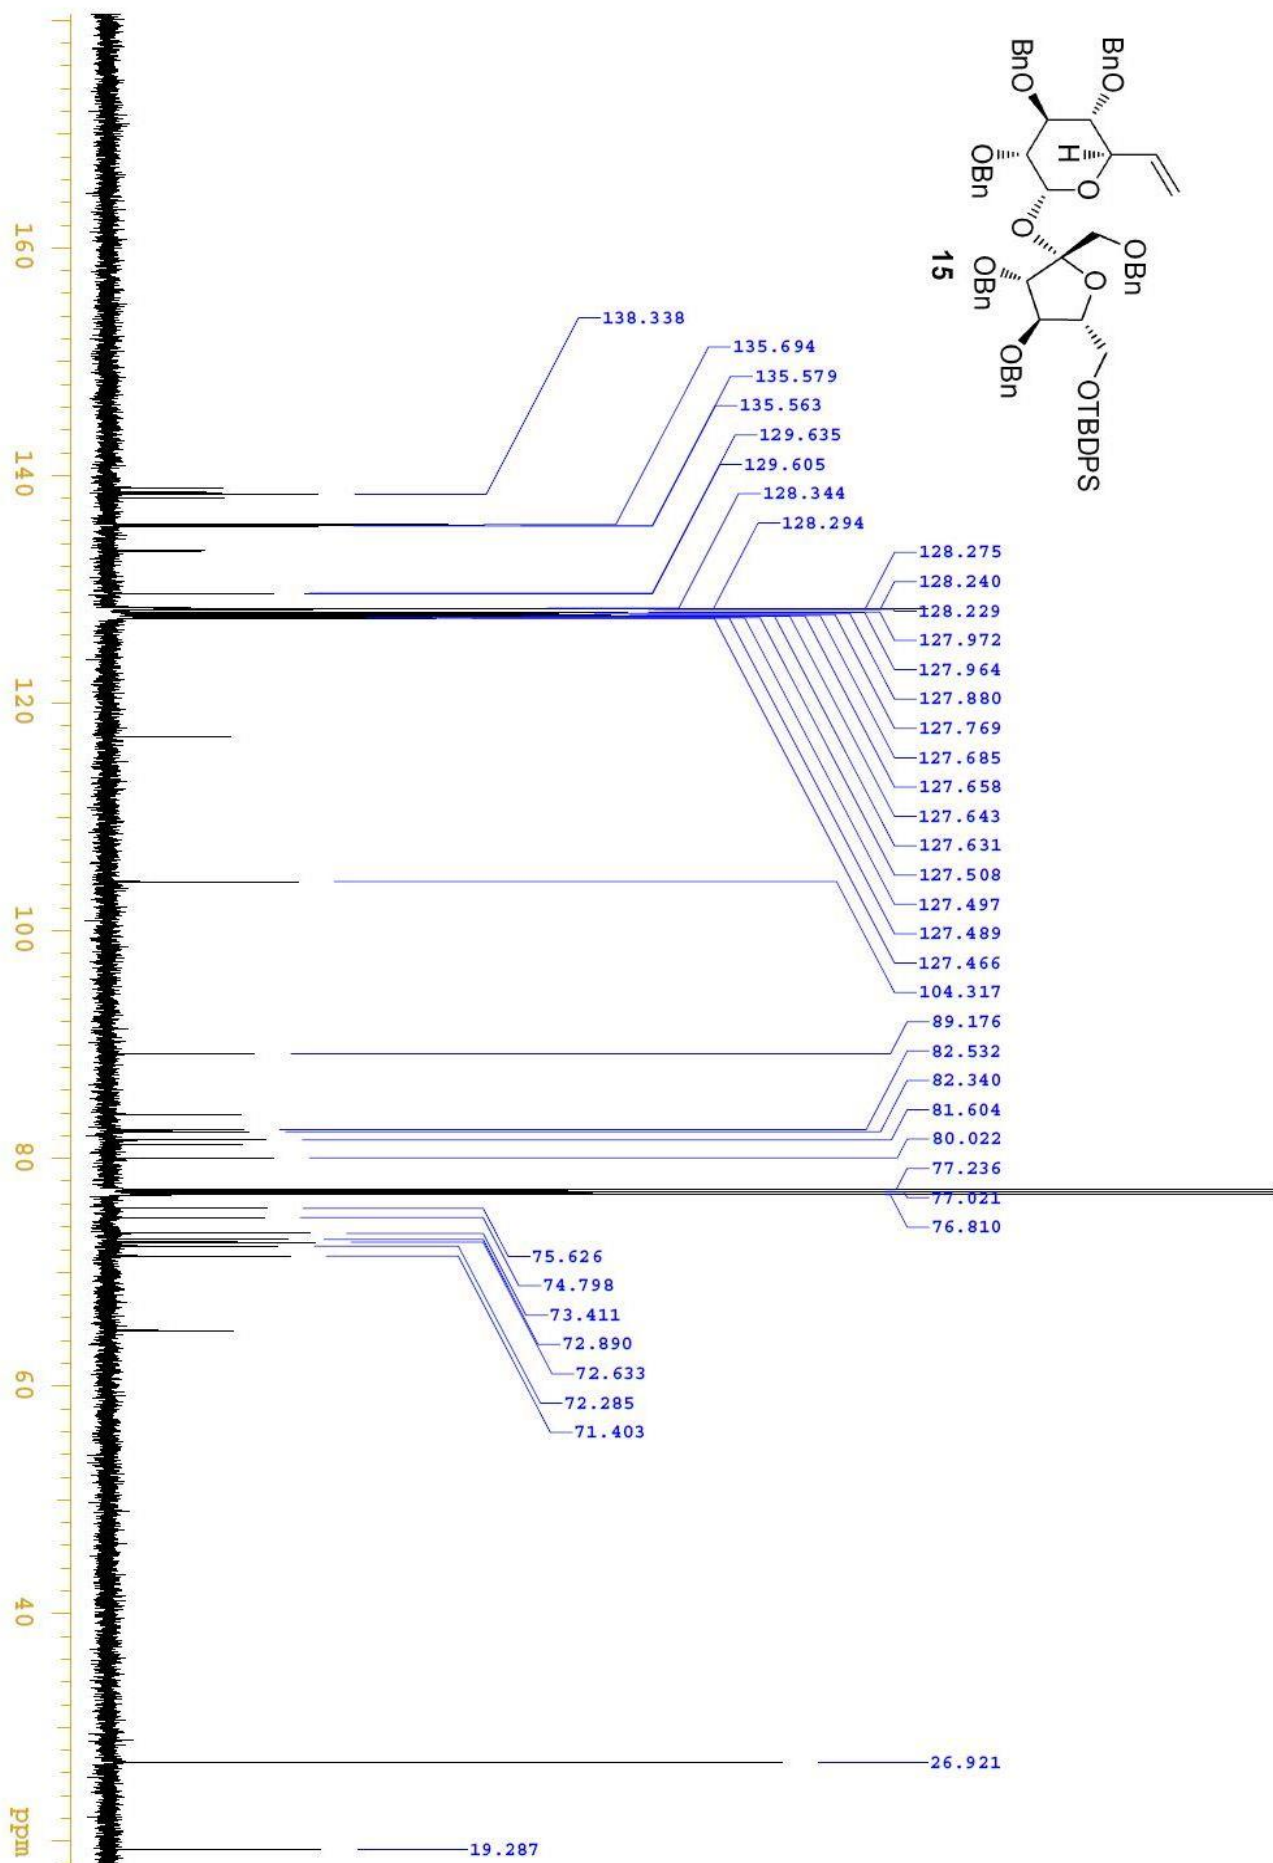

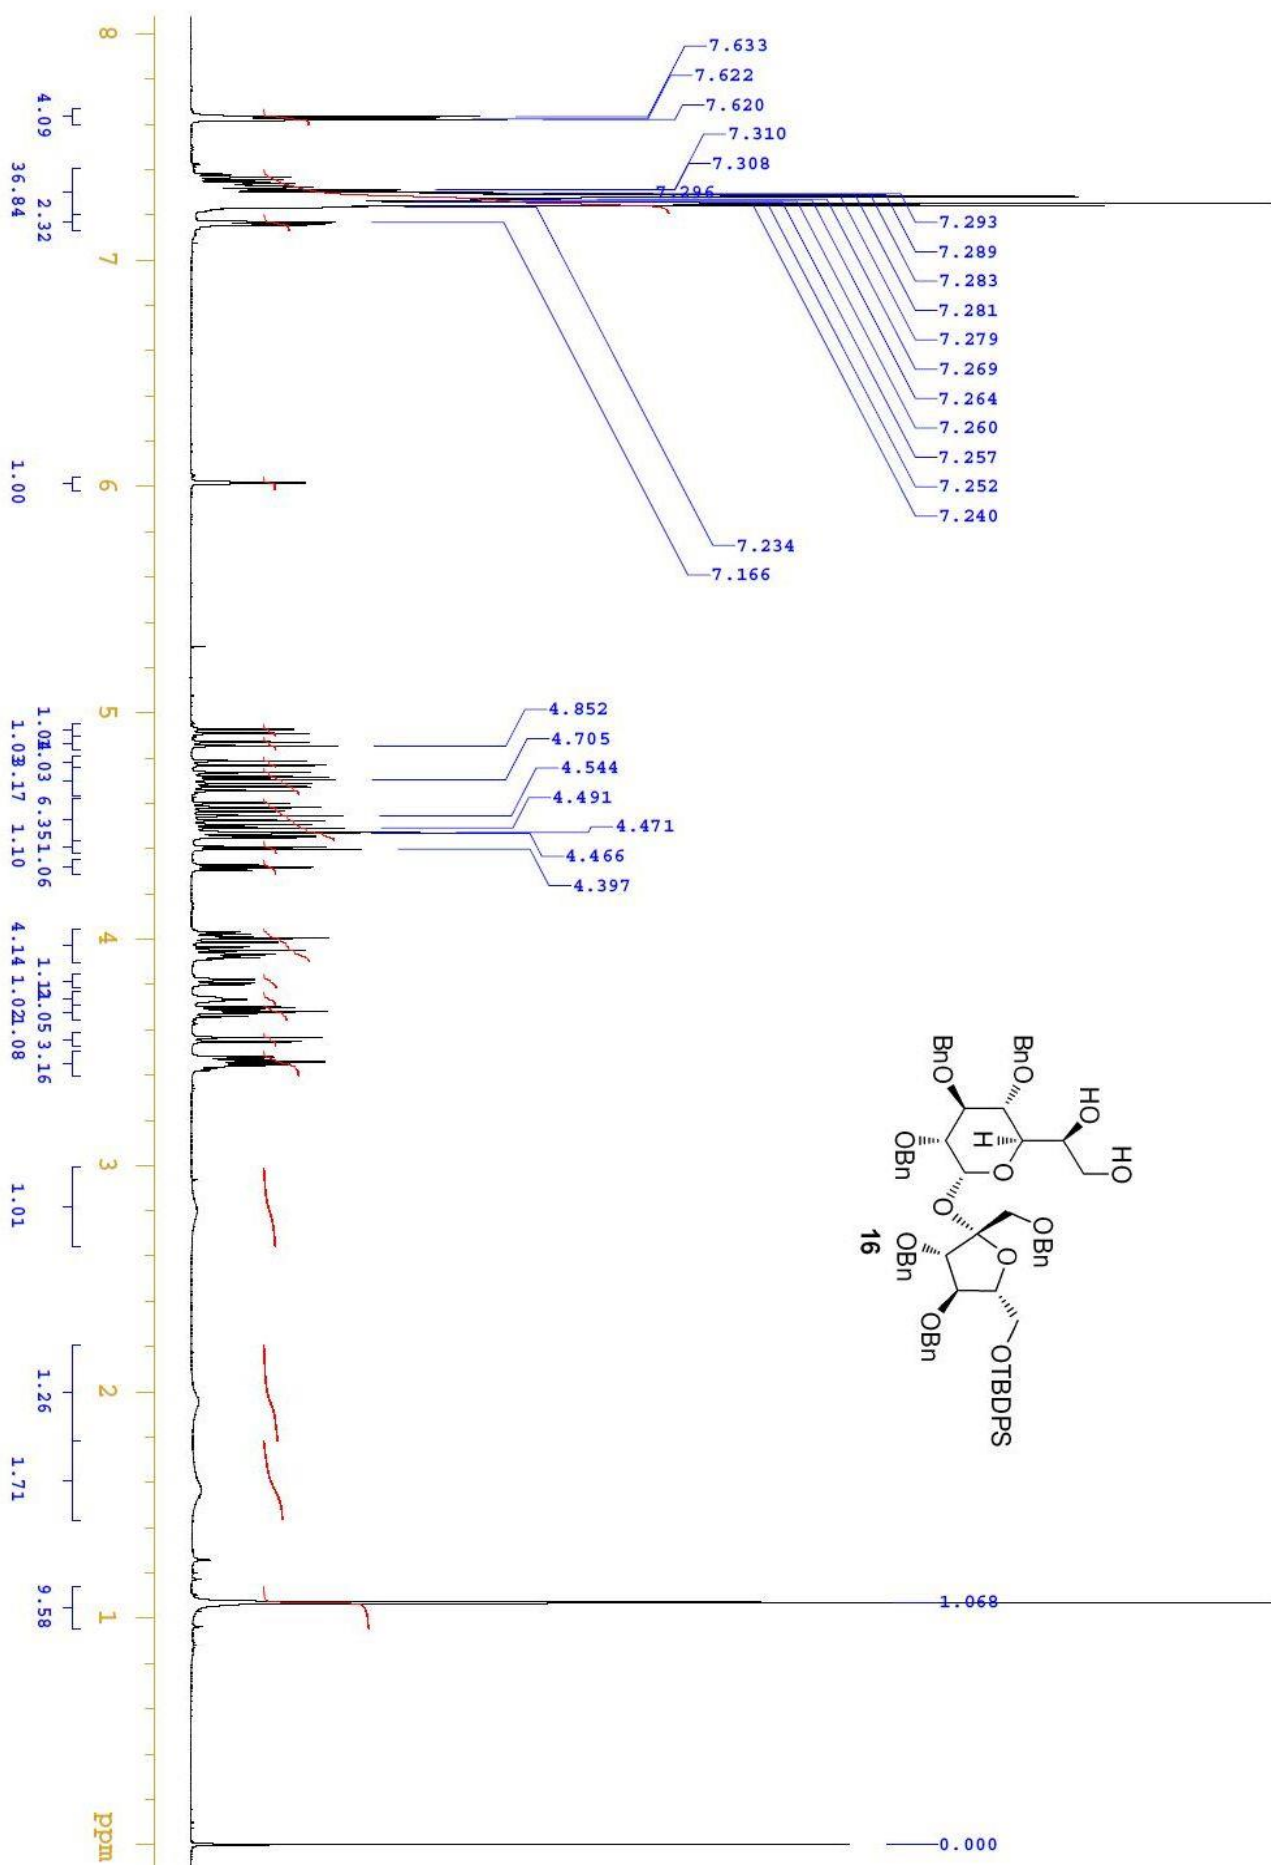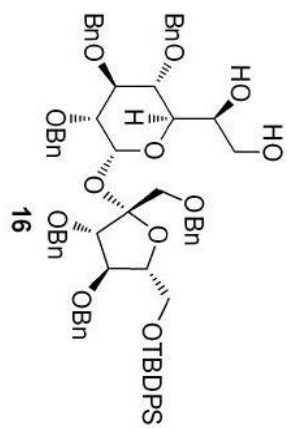

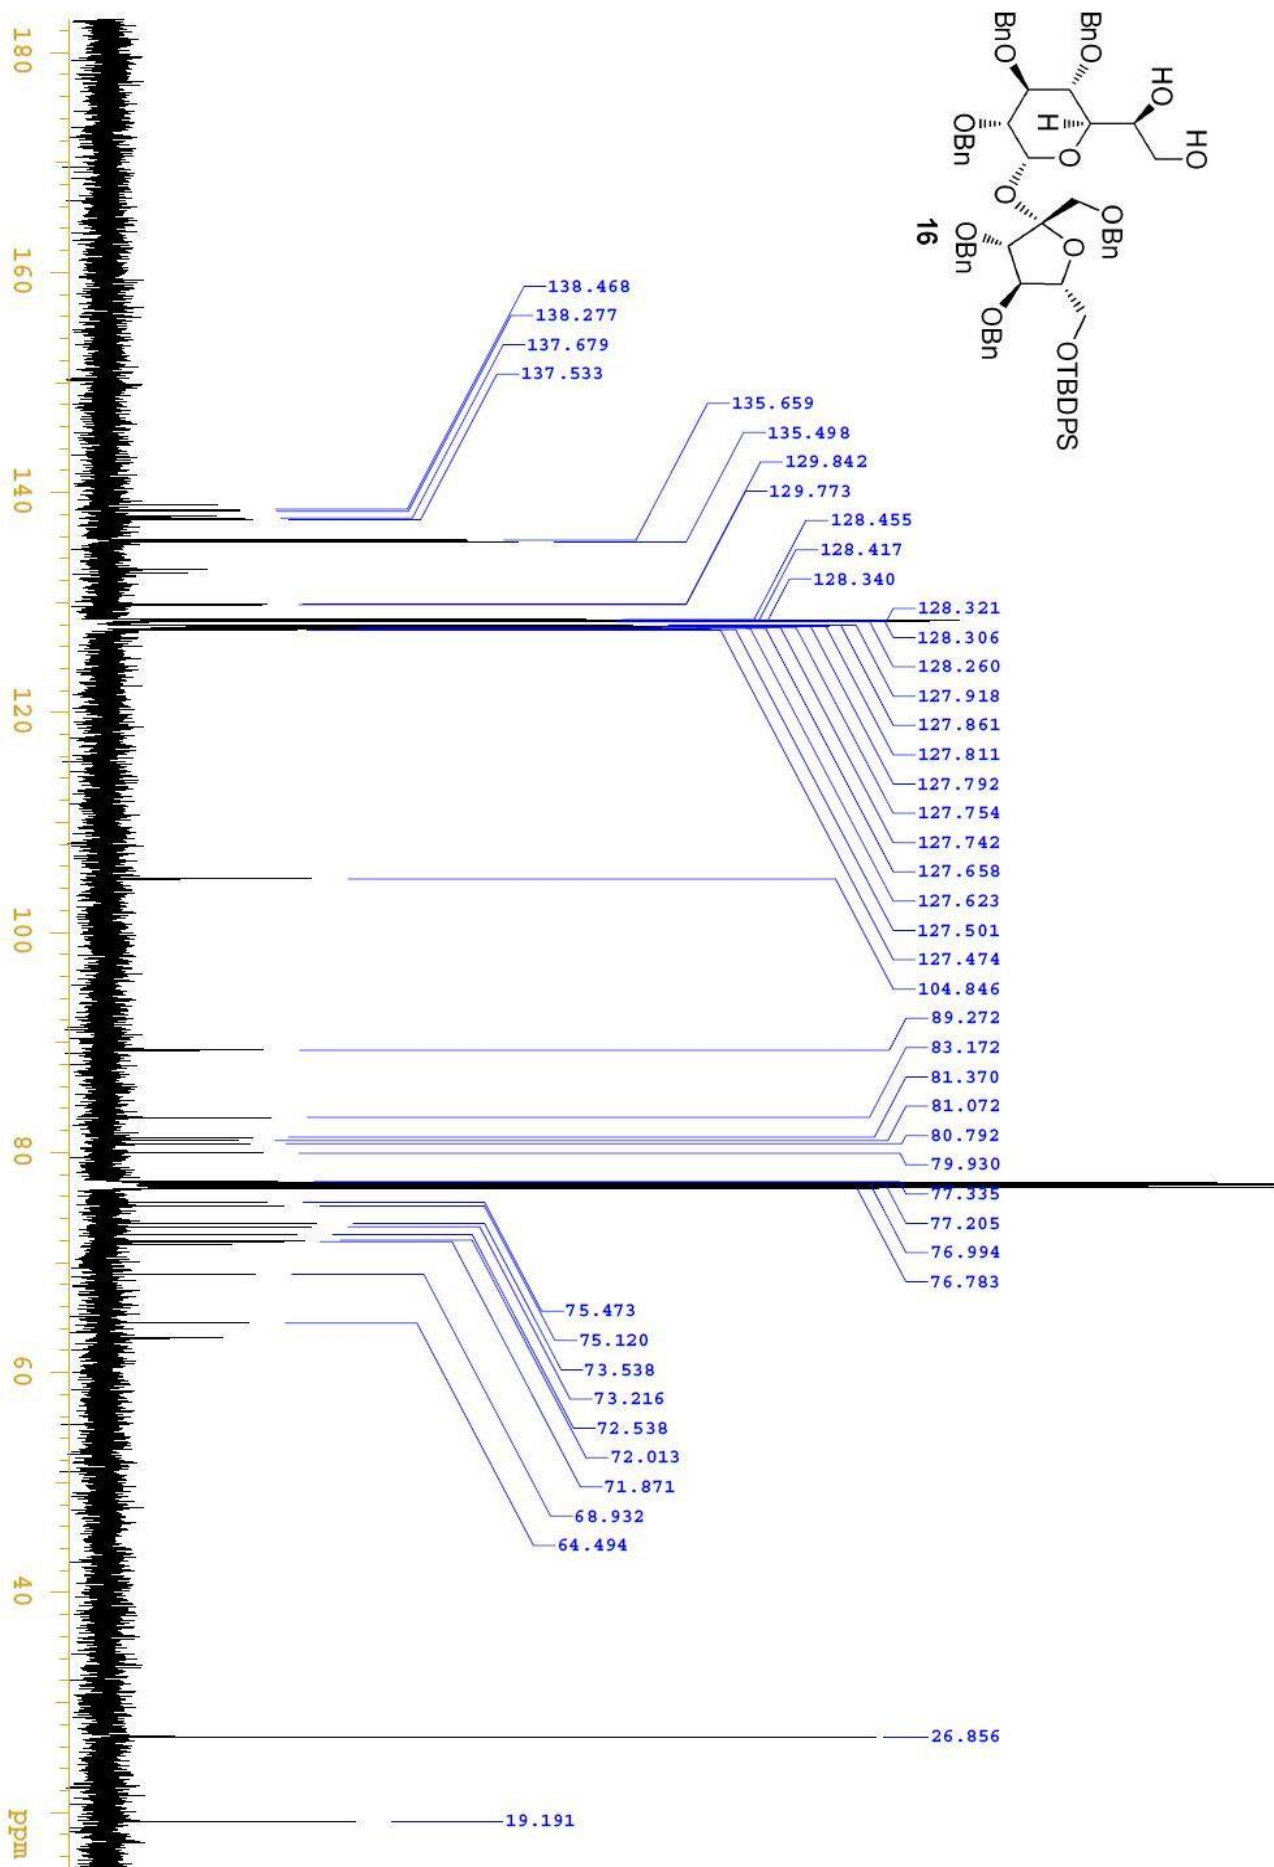

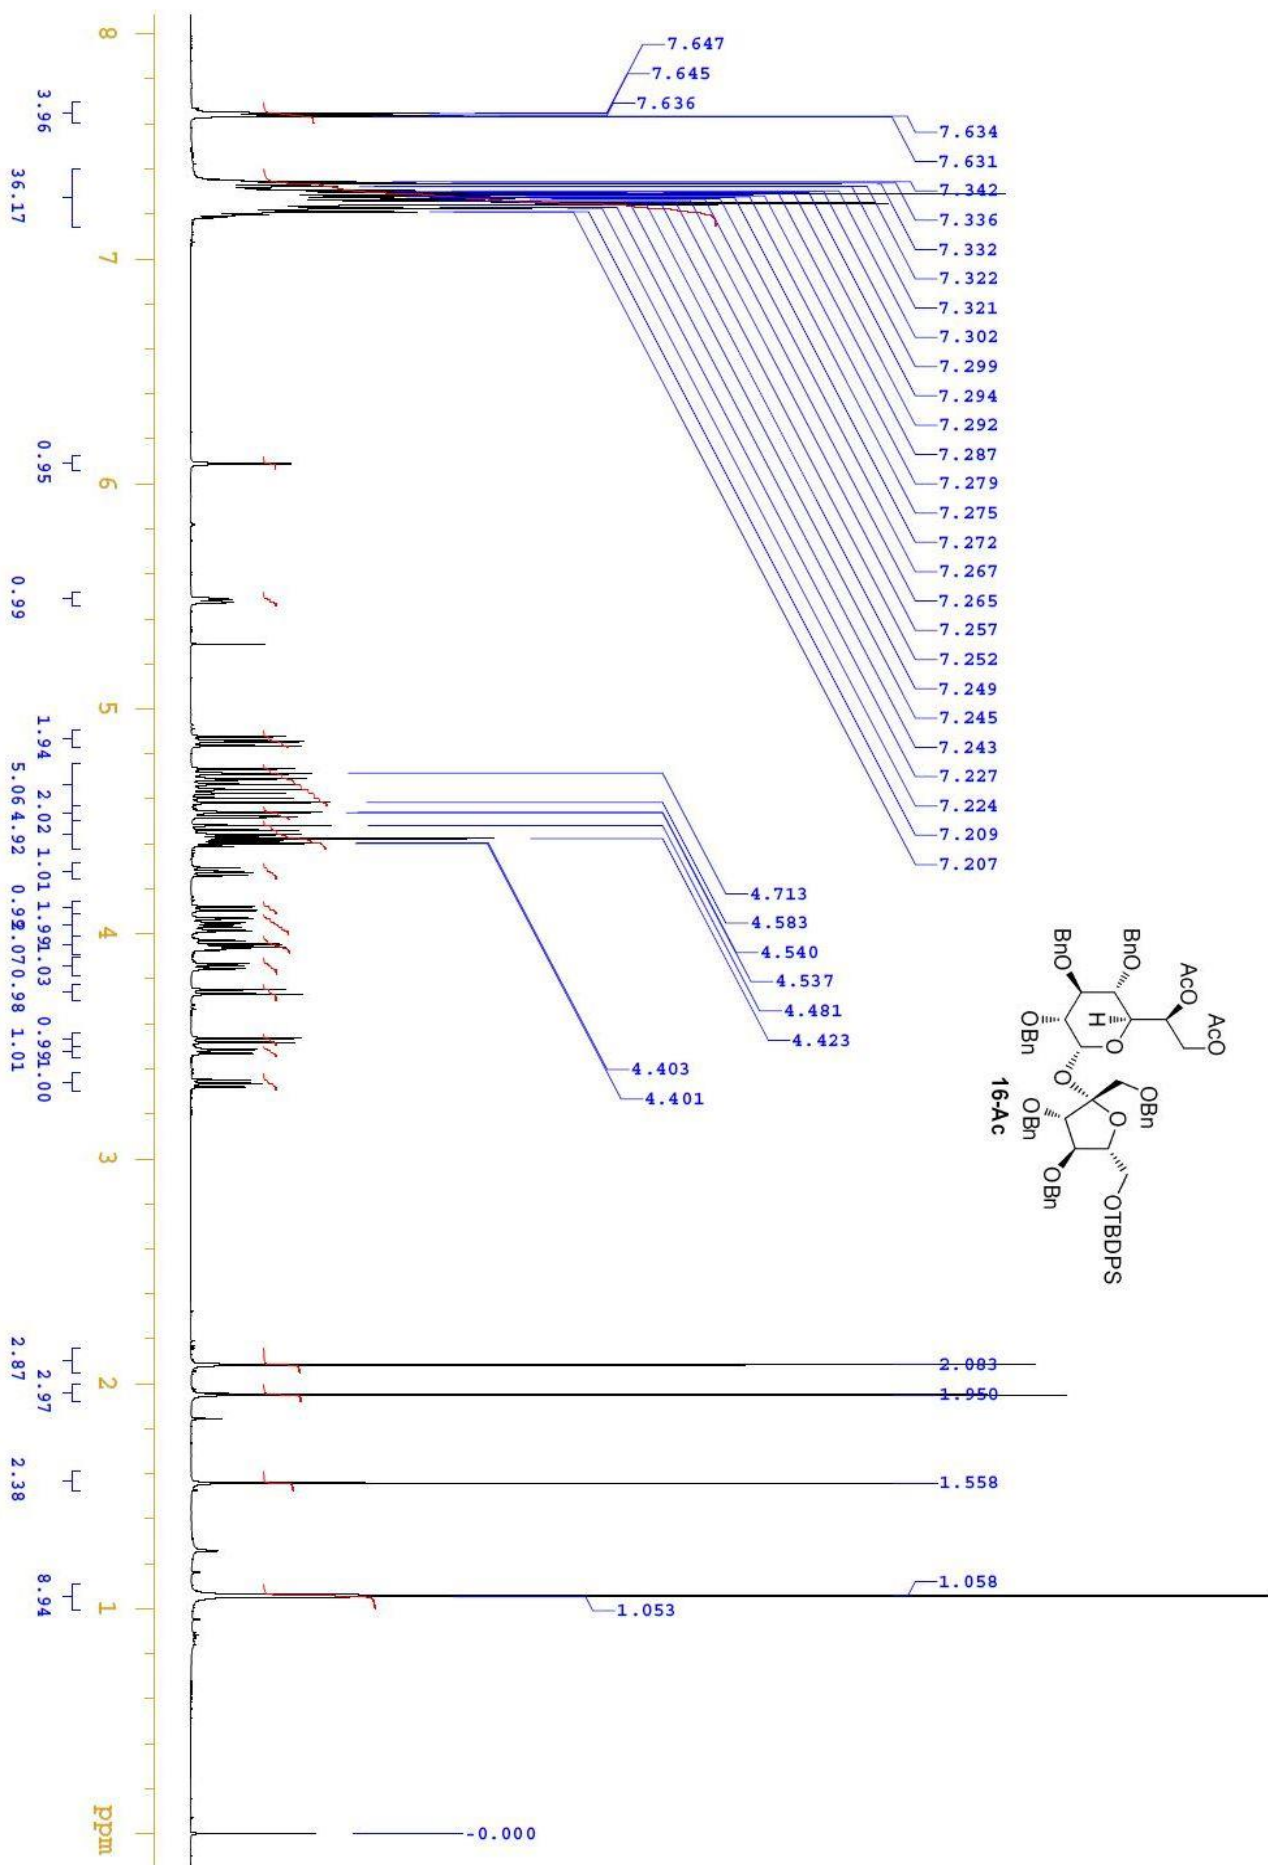



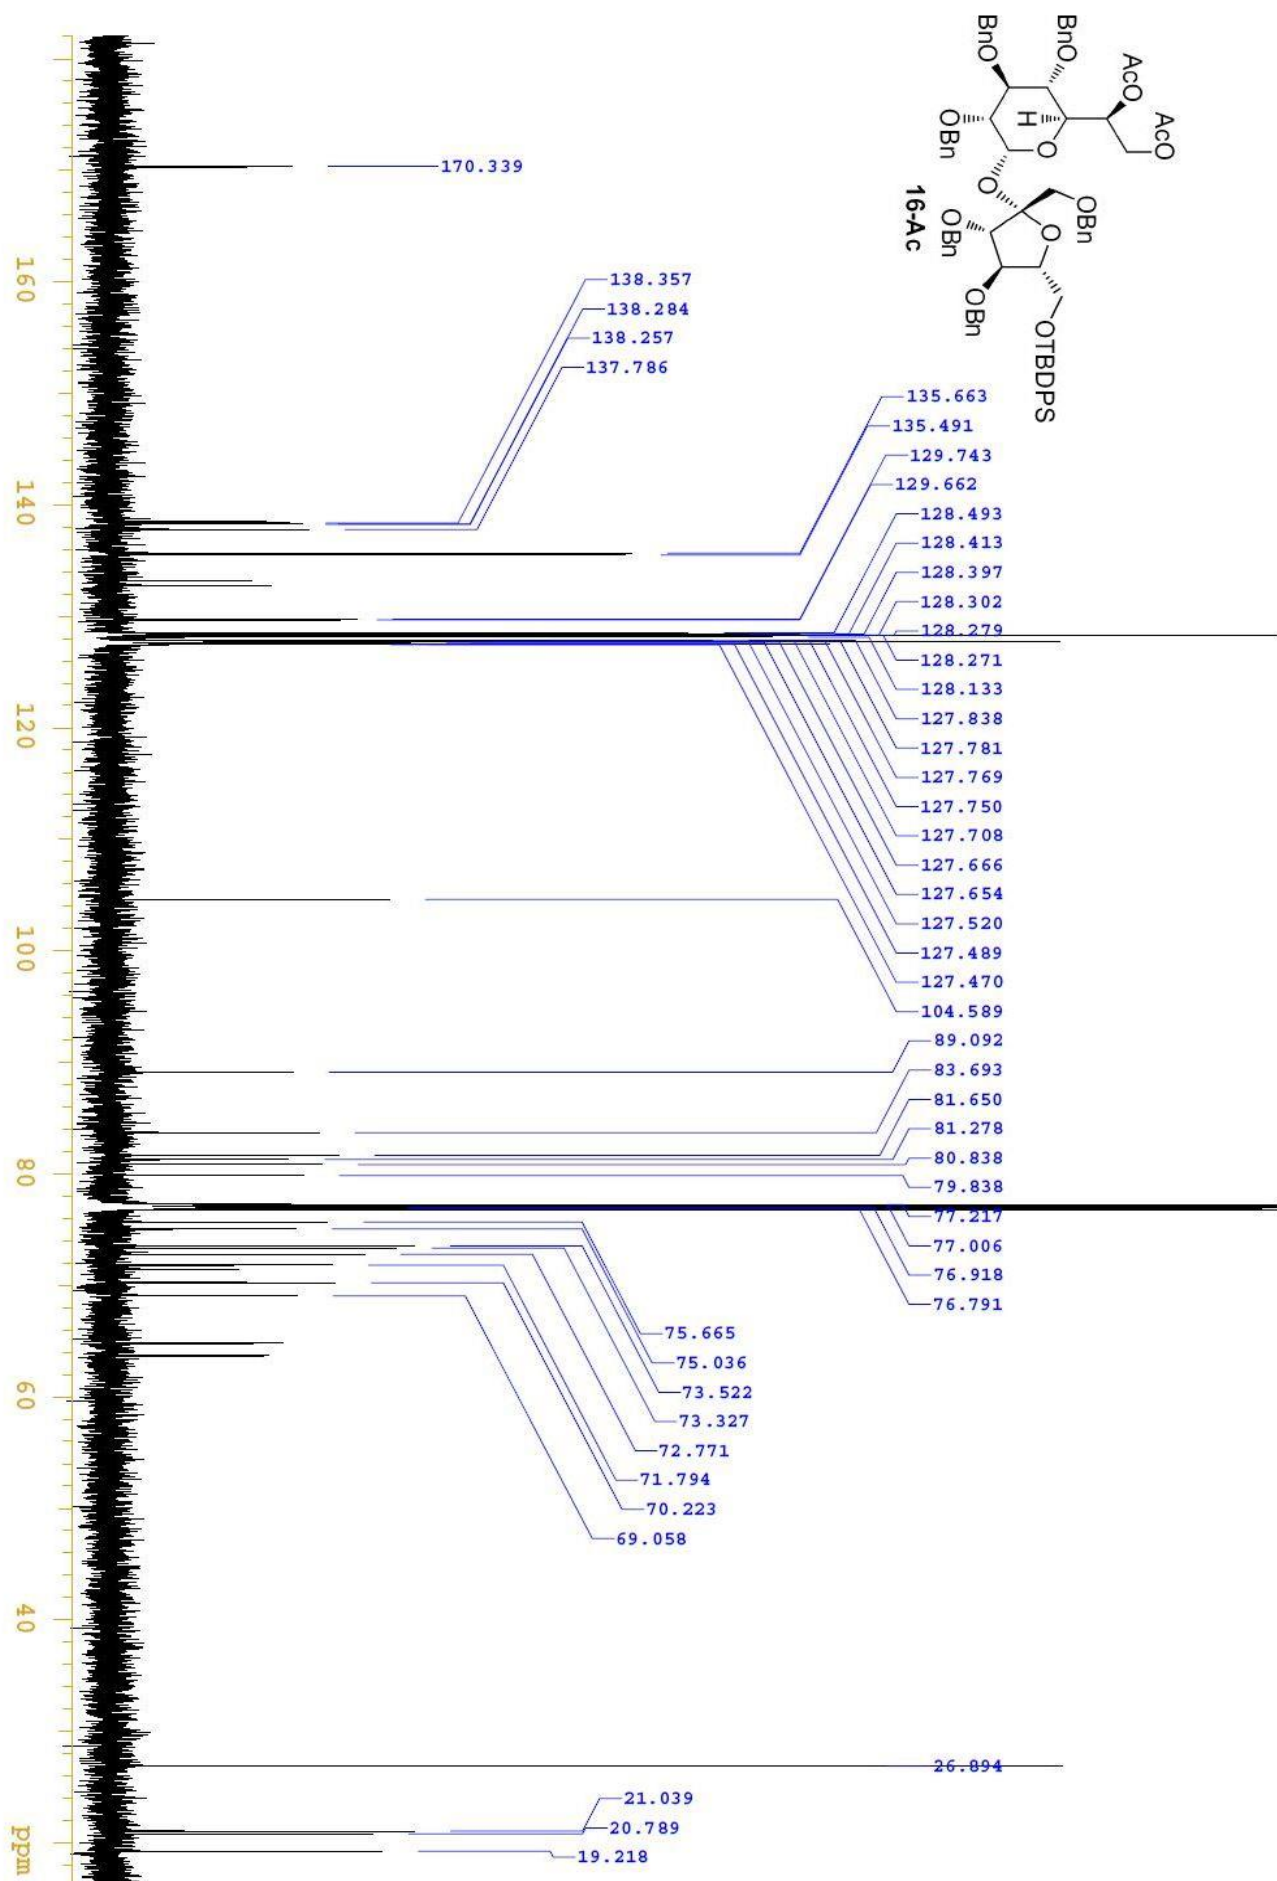

Supplement: Additional file 1 [file 1860-5397-10-124-S1.pdf]
